# Supplementary material for: A direct oxidative esterification of aldehydes with alcohols mediated by photochemical C–H bromination
Source: Royal Society of Chemistry journal article supplement (doi:10.1039/d4ob01237b), 2024-01-01

## Supporting Information

### A Direct Oxidative Esterification of Aldehydes with Alcohols Mediated by Photochemical C-H Bromination

Haru Ando,<sup>a</sup> Sakura Kodaki,<sup>a</sup> Hiroyoshi Takamura,<sup>a</sup>  
Isao Kadota,<sup>a\*</sup> and Kenta Tanaka<sup>b\*</sup>

<sup>a</sup> *Department of Chemistry, Graduate School of Natural Science and Technology,  
Okayama University, 3-1-1 Tsushima-Naka, Kitaku, Okayama 700-8530, Japan*

<sup>b</sup> *Department of Chemistry, Research Institute for Interdisciplinary Science, Okayama  
University, 3-1-1 Tsushima-Naka, Kitaku, Okayama 700-8530, Japan*

|                                                                 |     |
|-----------------------------------------------------------------|-----|
| 1. General information.....                                     | S2  |
| 2. Experimental section.....                                    | S3  |
| 3. Reference.....                                               | S16 |
| 4. <sup>1</sup> H NMR and <sup>13</sup> C NMR spectra data..... | S17 |

## 1. General information

Reagents were used as received from commercial suppliers unless otherwise indicated. Heating reactions were conducted by using an oil bath. Analytical thin layer chromatography (TLC) was performed with aluminum TLC plates (Merck TLC silica gel 60F254). Column chromatography was performed with Kanto Chemical silica gel 60N (40-100 mesh, spherical, neutral). IR spectra were recorded on IRSpirit-T.  $^1\text{H}$  and  $^{13}\text{C}$  NMR spectra were recorded on a Varian NMR System PS600 or a Varian 400MR ASW. Chemical shifts in the NMR spectra are reported in ppm with reference to the internal residual solvents ( $^1\text{H}$  NMR,  $\text{CDCl}_3$  7.26 ppm, DMSO 2.50 ppm;  $^{13}\text{C}$  NMR,  $\text{CDCl}_3$  77.0 ppm). The following abbreviations are used to designate the multiplicities: s = singlet, d = doublet, t = triplet, q = quartet, m = multiplet, br = broad. High-resolution mass spectra were recorded on Bruker micrOTOF II (ESI-TOF-MS). All melting points are reported in degree Celsius ( $^{\circ}\text{C}$ ) (uncorrected) and were measured on a YAZAWA (BY-2) micro melting point. Photochemical reaction was carried out with a photoreactor (EvoluChem<sup>TM</sup> PhotoRedOx Box) and LED (HCK1012-01-013, 380 nm, 18 W and HCK1012-01-011, 365 nm, 18W).

## 2. Experimental section

### General procedure for the photochemical esterification (Method A)

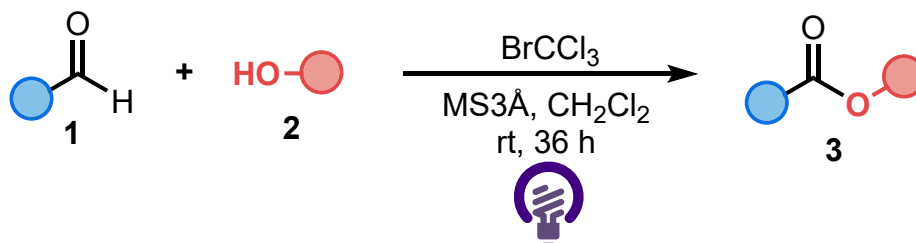

Aldehyde **1** (0.2 mmol), alcohol **2** (0.26 mmol), bromotrichloromethane (60.0  $\mu\text{L}$ , 0.6 mmol),  $\text{MS3Å}$  (50 mg), and  $\text{CH}_2\text{Cl}_2$  (2.0 mL) were added into a 4 mL borosilicate vial. After bubbling with argon for 5 min, the resulting solution was stirred at room temperature under light irradiation ( $\lambda_{\text{ex}} = 380 \text{ nm}$ ) for 36 h. The reaction mixture was diluted with  $\text{CH}_2\text{Cl}_2$  and washed with  $\text{H}_2\text{O}$ . The organic layer was dried over  $\text{Na}_2\text{SO}_4$ , filtered, and concentrated under reduced pressure. The residue was purified by flash chromatography to give the ester **3**.

### General procedure for the photochemical esterification (Method B)

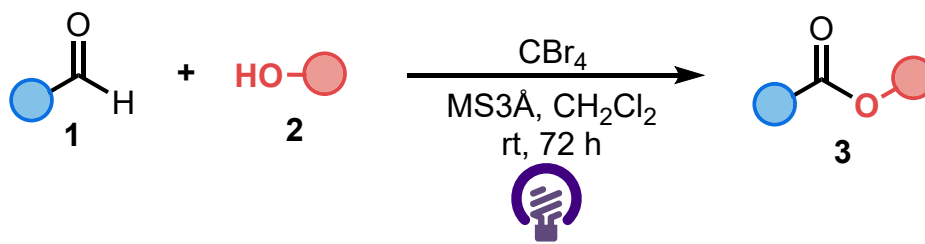

Aldehyde **1** (0.2 mmol), alcohol **2** (0.26 mmol), tetrabromomethane (199.0 mg, 0.6 mmol),  $\text{MS3Å}$  (50 mg), and  $\text{CH}_2\text{Cl}_2$  (2.0 mL) were added into a 4 mL borosilicate vial. After bubbling with argon for 5 min, the resulting solution was stirred at room temperature under light irradiation ( $\lambda_{\text{ex}} = 365 \text{ nm}$ ) for 72 h. The reaction mixture was diluted with  $\text{CH}_2\text{Cl}_2$  and washed with  $\text{H}_2\text{O}$ . The organic layer was dried over  $\text{Na}_2\text{SO}_4$ , filtered, and concentrated under reduced pressure. The residue was purified by flash chromatography to give the ester **3**.

### Butyl benzoate (**3a**, Method A)<sup>1</sup>

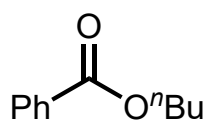

The reaction was carried out with benzaldehyde **1a** (20.4  $\mu$ L, 0.2 mmol), 1-butanol **2a** (24.0  $\mu$ L, 0.26 mmol), bromotrichloromethane (60.0  $\mu$ L, 0.6 mmol), MS3Å (50 mg), and CH<sub>2</sub>Cl<sub>2</sub> (2.0 mL). The residue was purified by flash chromatography (hexane/EtOAc = 100:1) to give the product **3a** (30.5 mg, 86%) as a colorless oil.

<sup>1</sup>H NMR (600 MHz, CDCl<sub>3</sub>)  $\delta$  8.05 (dd,  $J$  = 8.4, 1.2 Hz, 2H), 7.55 (tt,  $J$  = 7.5, 1.5 Hz, 1H), 7.44 (t,  $J$  = 7.8 Hz, 2H), 4.33 (t,  $J$  = 6.6 Hz, 2H), 1.78-1.73 (m, 2H), 1.52-1.45 (m, 2H), 0.98 (t,  $J$  = 7.5 Hz, 3H).

### Butyl 4-methoxybenzoate (**3b**, Method A)<sup>1</sup>

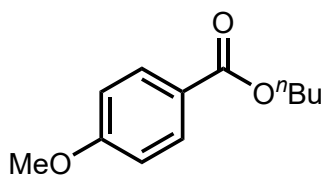

The reaction was carried out with *p*-methoxy benzaldehyde **1b** (24.3  $\mu$ L, 0.2 mmol), 1-butanol **2a** (24.0  $\mu$ L, 0.26 mmol), bromotrichloromethane (60.0  $\mu$ L, 0.6 mmol), MS3Å (50 mg), and CH<sub>2</sub>Cl<sub>2</sub> (2.0 mL). The residue was purified by flash chromatography (hexane/EtOAc = 70:1 to 20:1) to give the product **3b** (36.1 mg, 87%) as a colorless oil.

<sup>1</sup>H NMR (600 MHz, CDCl<sub>3</sub>)  $\delta$  7.99 (d,  $J$  = 9.0 Hz, 2H), 6.91 (d,  $J$  = 9.0 Hz, 2H), 4.29 (t,  $J$  = 6.6 Hz, 2H), 3.86 (s, 3H), 1.76-1.71 (m, 2H), 1.50-1.44 (m, 2H), 0.97 (t,  $J$  = 7.5 Hz, 3H).

### Butyl 4-(*tert*-butyl)benzoate (**3c**, Method A)<sup>2</sup>

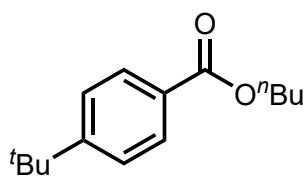

The reaction was carried out with 4-(*tert*-butyl)benzaldehyde **1c** (33.4  $\mu$ L, 0.2 mmol), 1-butanol **2a** (24.0  $\mu$ L, 0.26 mmol), bromotrichloromethane (60.0  $\mu$ L, 0.6 mmol), MS3Å (50 mg), and CH<sub>2</sub>Cl<sub>2</sub> (2.0 mL). The residue was purified by PTLC (hexane/EtOAc = 10:1) to give the product **3c** (34.4 mg, 73%) as a colorless oil.

<sup>1</sup>H NMR (400 MHz, CDCl<sub>3</sub>)  $\delta$  7.97 (d,  $J$  = 8.8 Hz, 2H), 7.45 (d,  $J$  = 8.8 Hz, 2H), 4.31 (t,  $J$  = 6.6 Hz, 2H), 1.78-1.71 (m, 2H), 1.52-1.42 (m, 2H), 1.34 (s, 9H), 0.98 (t,  $J$  = 7.4 Hz, 3H).

### Butyl 4-nitrobenzoate (**3d**, Method B)<sup>1</sup>

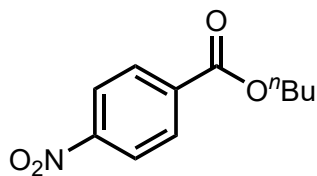

The reaction was carried out with *p*-nitro benzaldehyde **1d** (30.2 mg, 0.2 mmol), 1-butanol **2a** (24.0  $\mu$ L, 0.26 mmol), tetrabromomethane (199.0 mg, 0.6 mmol), MS3Å (50 mg), and CH<sub>2</sub>Cl<sub>2</sub> (2.0 mL). The residue was purified by PTLC

(hexane/EtOAc = 10:1) to give the product **3d** (36.4 mg, 82%) as a colorless oil.

$^1\text{H}$  NMR (600 MHz,  $\text{CDCl}_3$ )  $\delta$  8.29 (d,  $J$  = 8.4 Hz, 2H), 8.21 (d,  $J$  = 9.0 Hz, 2H), 4.38 (t,  $J$  = 6.9 Hz, 2H), 1.81-1.76 (m, 2H), 1.52-1.46 (m, 2H), 1.00 (t,  $J$  = 7.5 Hz, 3H).

#### Butyl 4-chlorobenzoate (**3e**, Method A)<sup>3</sup>

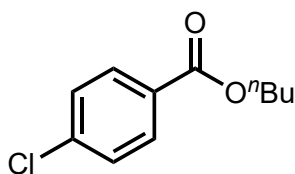

The reaction was carried out with 4-chlorobenzaldehyde **1e** (28.1 mg, 0.2 mmol), 1-butanol **2a** (24.0  $\mu\text{L}$ , 0.26 mmol), bromotrichloromethane (60.0  $\mu\text{L}$ , 0.6 mmol),  $\text{MS3\AA}$  (50 mg), and  $\text{CH}_2\text{Cl}_2$  (2.0 mL). The residue was purified by PTLC (preparative thin-layer chromatography) (hexane/EtOAc = 10:1) to give the product **3e** (20.8 mg, 49%) as a colorless oil.

$^1\text{H}$  NMR (400 MHz,  $\text{CDCl}_3$ )  $\delta$  7.97 (d,  $J$  = 8.8 Hz, 2H), 7.41 (d,  $J$  = 8.8 Hz, 2H), 4.32 (t,  $J$  = 6.6 Hz, 2H), 1.78-1.71 (m, 2H), 1.52-1.42 (m, 2H), 0.98 (t,  $J$  = 7.4 Hz, 3H).

#### Butyl 3-bromobenzoate (**3f**, Method A)<sup>3</sup>

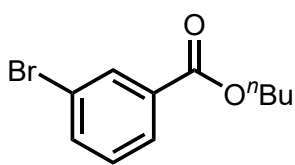

The reaction was carried out with 3-bromobenzaldehyde **1f** (23.4  $\mu\text{L}$ , 0.2 mmol), 1-butanol **2a** (24.0  $\mu\text{L}$ , 0.26 mmol), bromotrichloromethane (60.0  $\mu\text{L}$ , 0.6 mmol),  $\text{MS3\AA}$  (50 mg), and  $\text{CH}_2\text{Cl}_2$  (2.0 mL). The residue was purified by flash chromatography (hexane/EtOAc = 100:1 to 50:1) to give the product **3f** (29.7 mg, 58%) as a colorless oil.

$^1\text{H}$  NMR (400 MHz,  $\text{CDCl}_3$ )  $\delta$  8.17 (t,  $J$  = 1.6 Hz, 1H), 7.97 (dt,  $J$  = 7.6, 1.4 Hz, 1H), 7.68 (ddd,  $J$  = 8.0, 2.0, 1.2 Hz, 1H), 7.32 (t,  $J$  = 7.8 Hz, 1H), 4.33 (t,  $J$  = 6.8 Hz, 2H), 1.81-1.72 (m, 2H), 1.52-1.43 (m, 2H), 0.98 (t,  $J$  = 7.6 Hz, 3H).

#### Butyl 2-bromobenzoate (**3g**, Method A)<sup>4</sup>

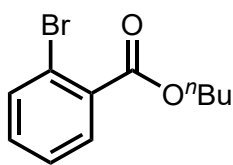

The reaction was carried out with 2-bromobenzaldehyde **1g** (23.1  $\mu\text{L}$ , 0.2 mmol), 1-butanol **2a** (24.0  $\mu\text{L}$ , 0.26 mmol), bromotrichloromethane (60.0  $\mu\text{L}$ , 0.6 mmol),  $\text{MS3\AA}$  (50 mg), and  $\text{CH}_2\text{Cl}_2$  (2.0 mL). The residue was purified by flash chromatography (hexane/EtOAc = 100:1 to 50:1) to give the product **3g** (31.2 mg, 61%) as a colorless oil.

$^1\text{H}$  NMR (600 MHz,  $\text{CDCl}_3$ )  $\delta$  7.78 (dd,  $J$  = 7.8, 1.8 Hz, 1H), 7.66 (dd,  $J$  = 7.2, 1.2 Hz, 1H), 7.36 (td,  $J$  = 7.8, 1.2 Hz, 1H), 7.32 (td,  $J$  = 7.8, 1.8 Hz, 1H), 4.35 (t,  $J$  = 6.6 Hz, 2H), 1.78-1.74 (m, 2H), 1.52-1.46 (m, 2H), 0.98 (t,  $J$  = 7.5 Hz, 3H).

#### Butyl thiophene-2-carboxylate (**3h**, Method A)<sup>5</sup>

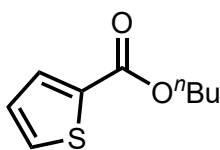

The reaction was carried out with 2-thiophenecarboxaldehyde **1h** (18.2  $\mu$ L, 0.2 mmol), 1-butanol **2a** (24.0  $\mu$ L, 0.26 mmol), bromotrichloromethane (60.0  $\mu$ L, 0.6 mmol), MS3Å (50 mg), and  $\text{CH}_2\text{Cl}_2$  (2.0 mL). The residue was purified by flash chromatography (hexane/EtOAc = 100:1) to give the product **3h** (11.6 mg, 31%) as a colorless oil.

$^1\text{H}$  NMR (600 MHz,  $\text{CDCl}_3$ )  $\delta$  7.80 (dd,  $J$  = 3.6, 1.8 Hz, 1H), 7.54 (dd,  $J$  = 4.8, 1.2 Hz, 1H), 7.10 (dd,  $J$  = 5.4, 3.6 Hz, 1H), 4.30 (t,  $J$  = 6.6 Hz, 2H), 1.76-1.71 (m, 2H), 1.49-1.43 (m, 2H), 0.98 (t,  $J$  = 7.2 Hz, 3H).

#### Butyl nicotinate (**3i**, Method A)<sup>1</sup>

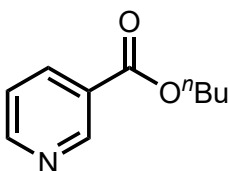

The reaction was carried out with 3-pyridinecarboxaldehyde **1i** (18.8  $\mu$ L, 0.2 mmol), 1-butanol **2a** (24.0  $\mu$ L, 0.26 mmol), bromotrichloromethane (60.0  $\mu$ L, 0.6 mmol),  $\text{NaHCO}_3$  (118.0 mg, 1.4 mmol), MS3Å (50 mg), and  $\text{CH}_2\text{Cl}_2$  (2.0 mL). The residue was purified by flash chromatography (hexane/EtOAc = 10:1 to 7:1) to give the product **3i** (25.1 mg, 70%) as a yellow oil.

$^1\text{H}$  NMR (600 MHz,  $\text{CDCl}_3$ )  $\delta$  9.22 (d,  $J$  = 1.8 Hz, 1H), 8.77 (dd,  $J$  = 5.4, 1.8 Hz, 1H), 8.30 (dt,  $J$  = 7.8, 1.8 Hz, 1H), 7.40 (ddd,  $J$  = 7.8, 4.8, 0.6 Hz, 1H), 4.36 (t,  $J$  = 6.9 Hz, 2H), 1.79-1.74 (m, 2H), 1.51-1.45 (m, 2H), 0.98 (t,  $J$  = 7.5 Hz, 3H).

#### Butyl cinnamate (**3j** Method B)<sup>6</sup>

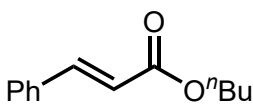

The reaction was carried out with cinnamaldehyde **1j** (25.2 mg, 0.2 mmol), 1-butanol **2a** (24.0  $\mu$ L, 0.26 mmol), tetrabromomethane (199.0 mg, 0.6 mmol), MS3Å (50 mg), and  $\text{CH}_2\text{Cl}_2$  (2.0 mL). The residue was purified by flash chromatography (hexane/EtOAc = 100:1) to give the product **3j** (28.5 mg, 70%) as a colorless oil.

$^1\text{H}$  NMR (600 MHz,  $\text{CDCl}_3$ )  $\delta$  7.68 (d,  $J$  = 15.6 Hz, 1H), 7.54-7.52 (m, 2H), 7.40-7.37 (m, 3H), 6.44 (d,  $J$  = 15.6 Hz, 1H), 4.21 (t,  $J$  = 6.9 Hz, 2H), 1.72-1.67 (m, 2H), 1.46-1.41 (m, 2H), 0.97 (t,  $J$  = 7.5 Hz, 3H).

#### Butyl decanoate (**3k**, Method A)<sup>7</sup>

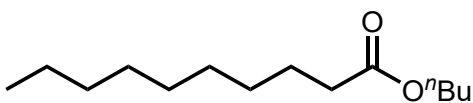

The reaction was carried out with decanal **1k** (37.7  $\mu$ L, 0.2 mmol), 1-butanol **2a** (24.0  $\mu$ L, 0.26 mmol), bromotrichloromethane (60.0  $\mu$ L, 0.6 mmol), MS3Å (50 mg), and  $\text{CH}_2\text{Cl}_2$  (2.0 mL). The residue was purified by flash chromatography (hexane/EtOAc = 100:1) to give the product **3k** (44.0 mg, 96%) as a

colorless oil.

$^1\text{H}$  NMR (600 MHz,  $\text{CDCl}_3$ )  $\delta$  4.06 (t,  $J$  = 6.9 Hz, 2H), 2.28 (t,  $J$  = 7.5 Hz, 2H), 1.66-1.57 (m, 4H), 1.42-1.34 (m, 2H), 1.31-1.25 (m, 12H), 0.93 (t,  $J$  = 7.5 Hz, 3H), 0.87 (t,  $J$  = 7.2 Hz, 3H).

#### Butyl 2-phenylacetate (**3l**, Method B)<sup>1</sup>

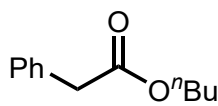

The reaction was carried out with phenylacetaldehyde **1l** (22.9 mg, 0.2 mmol), 1-butanol **2a** (24.0  $\mu\text{L}$ , 0.26 mmol), tetrabromomethane (199.0 mg, 0.6 mmol),  $\text{MS3\AA}$  (50 mg), and  $\text{CH}_2\text{Cl}_2$  (2.0 mL). The residue was purified by flash chromatography (hexane/EtOAc = 100:1) to give the product **3l** (20.7 mg, 54%) as a colorless oil.

$^1\text{H}$  NMR (600 MHz,  $\text{CDCl}_3$ )  $\delta$  7.34-7.31 (m, 2H), 7.29-7.24 (m, 3H), 4.09 (t,  $J$  = 6.6 Hz, 2H), 3.61 (s, 2H), 1.62-1.57 (m, 2H), 1.37-1.31 (m, 2H), 0.91 (t,  $J$  = 7.5 Hz, 3H).

#### Butyl 2-ethylhexanoate (**3m**, Method A)<sup>1</sup>

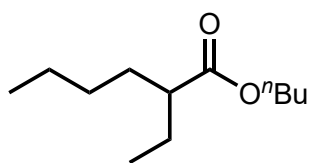

The reaction was carried out with 2-ethylhexanal **1m** (31.3  $\mu\text{L}$ , 0.2 mmol), 1-butanol **2a** (24.0  $\mu\text{L}$ , 0.26 mmol), bromotrichloromethane (60.0  $\mu\text{L}$ , 0.6 mmol),  $\text{MS3\AA}$  (50 mg), and  $\text{CH}_2\text{Cl}_2$  (2.0 mL). The residue was purified by flash chromatography (hexane/EtOAc = 100:1) to give the product **3m** (32.0 mg, 80%) as a colorless oil.

$^1\text{H}$  NMR (600 MHz,  $\text{CDCl}_3$ )  $\delta$  4.08 (t,  $J$  = 6.6 Hz, 2H), 2.27-2.23 (m, 1H), 1.64-1.57 (m, 5H), 1.54-1.21 (m, 7H), 0.94 (t,  $J$  = 7.8 Hz, 3H), 0.90-0.87 (m, 6H).

#### Butyl cyclohexanecarboxylate (**3n**, Method A)<sup>1</sup>

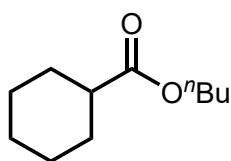

The reaction was carried out with aldehyde **1n** (37.7  $\mu\text{L}$ , 0.2 mmol), 1-butanol **2a** (24.0  $\mu\text{L}$ , 0.26 mmol), bromotrichloromethane (60.0  $\mu\text{L}$ , 0.6 mmol),  $\text{MS3\AA}$  (50 mg), and  $\text{CH}_2\text{Cl}_2$  (2.0 mL). The residue was purified by flash chromatography (hexane/EtOAc = 100:1) to give the product **3n** (30.4 mg, 82%) as a colorless oil.

$^1\text{H}$  NMR (600 MHz,  $\text{CDCl}_3$ )  $\delta$  4.05 (t,  $J$  = 6.6 Hz, 2H), 2.28 (tt,  $J$  = 11.4, 3.6 Hz, 1H), 1.90-1.88 (m, 2H), 1.76-1.73 (m, 2H), 1.64-1.57 (m, 3H), 1.46-1.34 (m, 4H), 1.31-1.18 (m, 3H), 0.93 (t,  $J$  = 7.2 Hz, 3H).

#### Butyl adamantane-1-carboxylate (**3o**, Method A)<sup>1</sup>

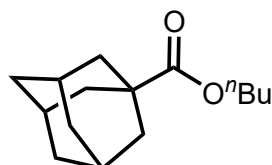

The reaction was carried out with aldehyde **1o**<sup>2</sup> (37.7  $\mu\text{L}$ , 0.2

mmol), 1-butanol **2a** (24.0  $\mu$ L, 0.26 mmol), bromotrichloromethane (60.0  $\mu$ L, 0.6 mmol), MS3Å (50 mg), and CH<sub>2</sub>Cl<sub>2</sub> (2.0 mL). The residue was purified by flash chromatography (hexane/EtOAc = 100:1) to give the product **3o** (45.7 mg, 97%) as a colorless oil.

<sup>1</sup>H NMR (600 MHz, CDCl<sub>3</sub>)  $\delta$  4.04 (t, *J* = 6.6 Hz, 2H), 2.02-2.00 (m, 3H), 1.88 (d, *J* = 3.0 Hz, 6H), 1.74-1.68 (m, 6H), 1.62-1.57 (m, 2H), 1.41-1.35 (m, 2H), 0.93 (t, *J* = 7.2 Hz, 3H).

#### Dibutyl [1,1'-biphenyl]-4,4'-dicarboxylate (**3p**, Method B)<sup>8</sup>

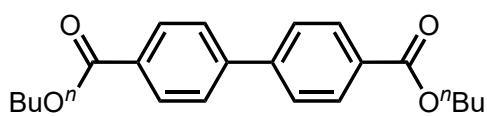

The reaction was carried out with 4,4'-biphenyldicarboxaldehyde **1p** (26.9 mg, 0.2 mmol), 1-butanol **2a** (110  $\mu$ L, 1.2 mmol), tetrabromomethane (398.9 mg, 1.2 mmol), MS3Å (50 mg), and CH<sub>2</sub>Cl<sub>2</sub> (2.0 mL). The residue was purified by PTLC (hexane/EtOAc = 10:1) to give the product **3p** (45.4 mg, 63%) as a white solid.

<sup>1</sup>H NMR (600 MHz, CDCl<sub>3</sub>)  $\delta$  8.13 (d, *J* = 8.4 Hz, 4H), 7.69 (d, *J* = 8.4 Hz, 4H), 4.36 (t, *J* = 6.6 Hz, 4H), 1.82-1.76 (m, 4H), 1.53-1.47 (m, 4H), 1.00 (t, *J* = 7.5 Hz, 6H).

#### Dibutyl phthalate (**3q**, Method B)<sup>9</sup>

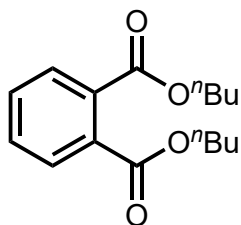

The reaction was carried out with *o*-phthalaldehyde **1q** (26.9 mg, 0.2 mmol), 1-butanol **2a** (110  $\mu$ L, 1.2 mmol), tetrabromomethane (398.9 mg, 1.2 mmol), MS3Å (50 mg), and CH<sub>2</sub>Cl<sub>2</sub> (2.0 mL). The residue was purified by PTLC (hexane/EtOAc = 10:1) to give the product **3q** (24.4 mg, 42%) as a yellow oil.

<sup>1</sup>H NMR (600 MHz, CDCl<sub>3</sub>)  $\delta$  7.73-7.70 (m, 2H), 7.54-7.51 (m, 2H), 4.35 (t, *J* = 6.6 Hz, 2H), 1.74-1.69 (m, 4H), 1.47-1.41 (m, 4H), 0.96 (t, *J* = 7.2 Hz, 3H).

#### Tributyl benzene-1,3,5-tricarboxylate (**3r**, Method B)<sup>10</sup>

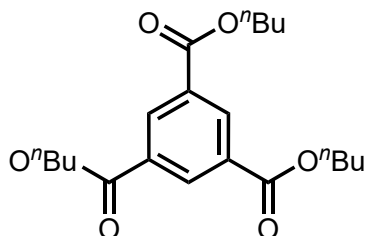

The reaction was carried out with benzene-1,3,5-tricarbaldehyde **1r** (32.4 mg, 0.2 mmol), 1-butanol **2a** (164  $\mu$ L, 1.8 mmol), tetrabromomethane (599.5 mg, 1.8 mmol), MS3Å (50 mg), and CH<sub>2</sub>Cl<sub>2</sub> (2.0 mL). The residue was purified by PTLC (hexane/EtOAc = 10:1) to give the product **3r** (35.4 mg, 54 %) as a white solid.

<sup>1</sup>H NMR (600 MHz, CDCl<sub>3</sub>)  $\delta$  8.84 (s, 3H), 4.38 (t, *J* = 6.6 Hz, 2H), 1.81-1.76 (m, 6H), 1.54-1.46 (m, 6H), 0.99 (t, *J* = 7.5 Hz, 9H).

### Decyl benzoate (**3s**, Method A)<sup>1</sup>

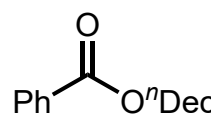

The reaction was carried out with benzaldehyde **1a** (20.4  $\mu$ L, 0.2 mmol), 1-decanol **2s** (49.6  $\mu$ L, 0.26 mmol), bromotrichloromethane (60.0  $\mu$ L, 0.6 mmol), MS3Å (50 mg), and CH<sub>2</sub>Cl<sub>2</sub> (2.0 mL). The residue was purified by flash chromatography (hexane/EtOAc = 100:1) to give the product **3s** (54.2 mg, 98%) as a colorless oil.

<sup>1</sup>H NMR (600 MHz, CDCl<sub>3</sub>)  $\delta$  8.05 (dd,  $J$  = 8.4, 1.2 Hz, 2H), 7.55 (tt,  $J$  = 7.5, 1.5 Hz, 1H), 7.44 (t,  $J$  = 7.8 Hz, 2H), 4.32 (t,  $J$  = 6.6 Hz, 2H), 1.79-1.74 (m, 2H), 1.47-1.42 (m, 2H), 1.38-1.27 (m, 12H), 0.88 (t,  $J$  = 6.9 Hz, 3H).

### Phenethyl benzoate (**3t**, Method A)<sup>11</sup>

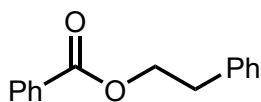

The reaction was carried out with benzaldehyde **1a** (20.4  $\mu$ L, 0.2 mmol), 2-phenylethanol **2t** (30.6  $\mu$ L, 0.26 mmol), bromotrichloromethane (60.0  $\mu$ L, 0.6 mmol), MS3Å (50 mg), and CH<sub>2</sub>Cl<sub>2</sub> (2.0 mL). The residue was purified by flash chromatography (hexane/EtOAc = 300:1 to 100:1) to give the product **3t** (32.4 mg, 72%) as a colorless oil.

<sup>1</sup>H NMR (600 MHz, CDCl<sub>3</sub>)  $\delta$  8.02 (dd,  $J$  = 8.4, 1.2 Hz, 2H), 7.55 (tt,  $J$  = 7.5, 1.5 Hz, 1H), 7.43 (t,  $J$  = 7.8 Hz, 2H), 7.35-7.29 (m, 4H), 7.25-7.24 (m, 1H), 4.54 (t,  $J$  = 7.2 Hz, 2H), 3.09 (t,  $J$  = 7.2 Hz, 2H).

### Cyclopropylmethyl benzoate (**3u**, Method A)<sup>12</sup>

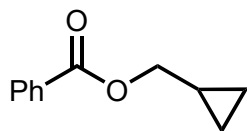

The reaction was carried out with benzaldehyde **1a** (20.4  $\mu$ L, 0.2 mmol), alcohol **2u** (20.6  $\mu$ L, 0.26 mmol), bromotrichloromethane (60.0  $\mu$ L, 0.6 mmol), MS3Å (50 mg), and CH<sub>2</sub>Cl<sub>2</sub> (2.0 mL). The residue was purified by PTLC (hexane/EtOAc = 10:1) to give the product **3u** (7.3 mg, 21%) as a white solid.

<sup>1</sup>H NMR (600 MHz, CDCl<sub>3</sub>)  $\delta$  8.10 (d,  $J$  = 7.2 Hz, 2H), 7.58 (tt,  $J$  = 7.5, 1.2 Hz, 2H), 7.47 (t,  $J$  = 7.8 Hz, 2H), 4.36 (d,  $J$  = 7.2 Hz, 2H), 1.32-1.25 (m, 2H), 0.67-0.63 (m, 2H), 0.41-0.38 (m, 2H).

### 2-Methoxyethyl benzoate (**3v**, Method A)<sup>13</sup>

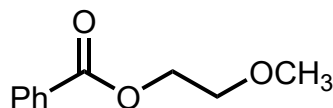

The reaction was carried out with benzaldehyde **1a** (20.4  $\mu$ L, 0.2 mmol), alcohol **2v** (20.6  $\mu$ L, 0.26 mmol), bromotrichloromethane (60.0  $\mu$ L, 0.6 mmol), MS3Å (50 mg), and CH<sub>2</sub>Cl<sub>2</sub> (2.0 mL). The residue was purified by PTLC (hexane/EtOAc = 10:1) to give the product **3v** (12.9 mg, 36%) as a white solid.

$^1\text{H}$  NMR (600 MHz,  $\text{CDCl}_3$ )  $\delta$  8.07 (m,  $J = 7.2$  Hz, 2H), 7.56 (tt,  $J = 7.5, 1.5$  Hz, 1H), 7.44 (t,  $J = 8.1$  Hz, 2H), 4.49-4.47 (m, 2H), 3.76-3.73 (m, 1H), 3.44 (s, 3H).

#### Ethane-1,2-diyl dibenzoate (**3w**, Method A)<sup>14</sup>

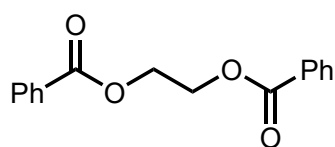

The reaction was carried out with benzaldehyde **1a** (20.4  $\mu\text{L}$ , 0.2 mmol), ethane-1,2-diol **2w** (29  $\mu\text{L}$ , 0.52 mmol), bromotrichloromethane (60.0  $\mu\text{L}$ , 0.6 mmol),  $\text{MS3\AA}$  (50 mg), and  $\text{CH}_2\text{Cl}_2$  (2.0 mL). The residue was purified by PTLC (hexane/EtOAc = 10:1) to give the product **3w** (13.0 mg, 24%) as a colorless oil.

$^1\text{H}$  NMR (600 MHz,  $\text{CDCl}_3$ )  $\delta$  8.05 (dd,  $J = 7.8, 1.8$  Hz, 4H), 7.55 (t,  $J = 6.9$  Hz, 1H), 7.43 (t,  $J = 7.8$  Hz, 4H), 4.66 (s, 4H).

#### Nonan-5-yl benzoate (**3x**, Method A)<sup>15</sup>

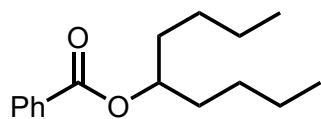

The reaction was carried out with benzaldehyde **1a** (20.4  $\mu\text{L}$ , 0.2 mmol), 5-nonaol **2x** (45.2  $\mu\text{L}$ , 0.26 mmol), bromotrichloromethane (60.0  $\mu\text{L}$ , 0.6 mmol),  $\text{MS3\AA}$  (50 mg), and  $\text{CH}_2\text{Cl}_2$  (2.0 mL). The residue was purified by flash chromatography (hexane/EtOAc = 100:1) to give the product **3x** (41.9 mg, 84%) as a colorless oil.

$^1\text{H}$  NMR (600 MHz,  $\text{CDCl}_3$ )  $\delta$  8.05 (dd,  $J = 8.4, 1.2$  Hz, 2H), 7.55 (tt,  $J = 7.5, 1.2$  Hz, 1H), 7.44 (t,  $J = 7.8$  Hz, 2H), 5.15-5.11 (m, 1H), 1.71-1.61 (m, 4H), 1.39-1.29 (m, 8H), 0.90-0.88 (m, 6H).

#### 2,4-Dimethylpentan-3-yl benzoate (**3y**, Method A)<sup>16</sup>

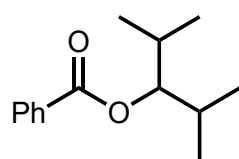

The reaction was carried out with benzaldehyde **1a** (20.4  $\mu\text{L}$ , 0.2 mmol), 2,4-dimethyl-3-pentanol **2y** (36.4  $\mu\text{L}$ , 0.26 mmol), bromotrichloromethane (60.0  $\mu\text{L}$ , 0.6 mmol),  $\text{MS3\AA}$  (50 mg), and  $\text{CH}_2\text{Cl}_2$  (2.0 mL). The residue was purified by flash chromatography (hexane/EtOAc = 100:1) to give the product **3y** (30.1 mg, 68%) as a colorless oil.

$^1\text{H}$  NMR (600 MHz,  $\text{CDCl}_3$ )  $\delta$  8.07 (dd,  $J = 8.4, 1.2$  Hz, 2H), 7.56 (tt,  $J = 7.5, 1.2$  Hz, 1H), 7.45 (t,  $J = 7.8$  Hz, 2H), 4.85 (t,  $J = 6.0$  Hz, 1H), 2.08-2.00 (m, 2H), 0.96-0.94 (m, 12H).

### Photochemical esterification with halogen sources

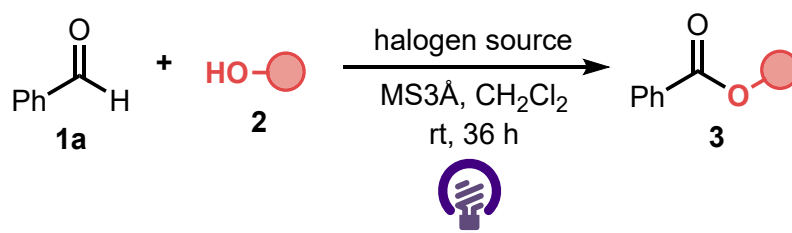

| alcohol       | halogen source     | yield (%) |
|---------------|--------------------|-----------|
| <br><b>2t</b> | BrCCl <sub>3</sub> | 72        |
|               | NBS                | 0         |
| <hr/>         |                    |           |
| <br><b>2x</b> | BrCCl <sub>3</sub> | 82        |
|               | NBS                | 0         |

### Esterification under thermal condition

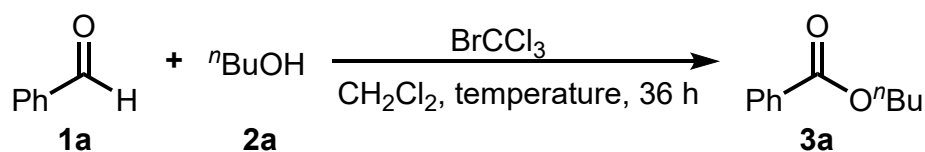

| entry | condition                        | yield (%) |
|-------|----------------------------------|-----------|
| 1     | 380 nm irradiation, rt           | 86        |
| 2     | reflux without light irradiation | 11        |

### Examination of the photochemical esterification of 4-nitrobenzaldehyde

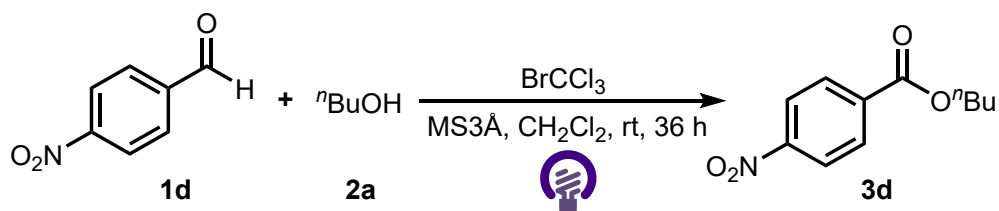

| entry | halogen source     | light      | yield (%) |
|-------|--------------------|------------|-----------|
| 1     | BrCCl <sub>3</sub> | 380 nm LED | 23        |
| 2     | CBr <sub>4</sub>   | 380 nm LED | 41        |
| 3     | CBr <sub>4</sub>   | 365 nm LED | <b>82</b> |

### Photochemical esterification under gram-scale condition

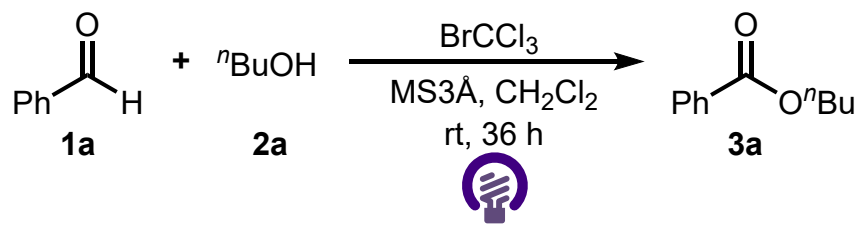

Aldehyde **1a** (1.01 mL, 10 mmol), 1-butanol **2a** (1.1 mL, 12 mmol), bromotrichloromethane (2.94 mL, 3.0 mmol),  $\text{MS3\AA}$  (500 mg), and  $\text{CH}_2\text{Cl}_2$  (100 mL) were added into a 100 mL 2 neck flask. After bubbling with argon for 5 min, the resulting solution was stirred at room temperature under light irradiation ( $\lambda_{\text{ex}} = 380 \text{ nm} \times 2$ ) for 36 h. The reaction mixture was diluted with  $\text{CH}_2\text{Cl}_2$  and washed with  $\text{H}_2\text{O}$ . The organic layer was dried over  $\text{Na}_2\text{SO}_4$ , filtered, and concentrated under reduced pressure. The residue was purified by flash chromatography (hexane/ $\text{EtOAc} = 50:1$ ) to give the product **3a** (1.15g, 65%) as a colorless oil.

### Mechanistic study of the photochemical esterification

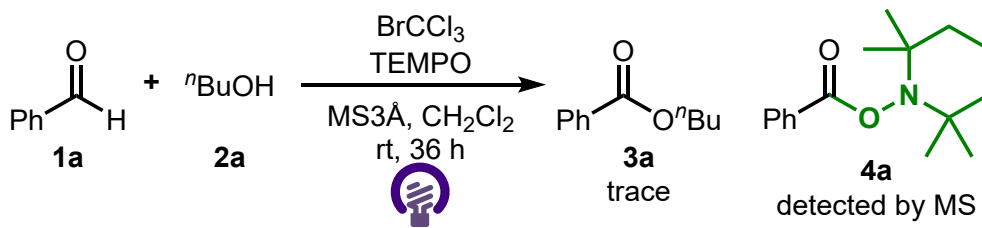

Benzaldehyde **1a** (20.4  $\mu\text{L}$ , 0.2 mmol), 1-butanol **2a** (24.0  $\mu\text{L}$ , 0.26 mmol), bromotrichloromethane (60.0  $\mu\text{L}$ , 0.6 mmol), MS3A (50 mg), TEMPO (93.8 mg, 0.6 mmol) and  $\text{CH}_2\text{Cl}_2$  (2.0 mL) were added into a 4 mL borosilicate vial. After bubbling with argon for 5 min, the resulting solution was stirred at room temperature under light irradiation ( $\lambda_{\text{max}} = 380 \text{ nm}$ ) for 36 h. The reaction mixture was diluted with  $\text{CH}_2\text{Cl}_2$  and washed with  $\text{H}_2\text{O}$ . The organic layer was dried over  $\text{Na}_2\text{SO}_4$ , filtered, and concentrated under reduced pressure. The compound **4a** was detected by HRMS (ESI TOF) analysis (calcd for  $\text{C}_{16}\text{H}_{23}\text{NO}_2\text{Na}$   $[\text{M} + \text{Na}]^+$  284.1626, found 284.1626). Then, the residue was purified by flash chromatography (hexane/EtOAc = 100:1) to give the trace amount of product **3a**.

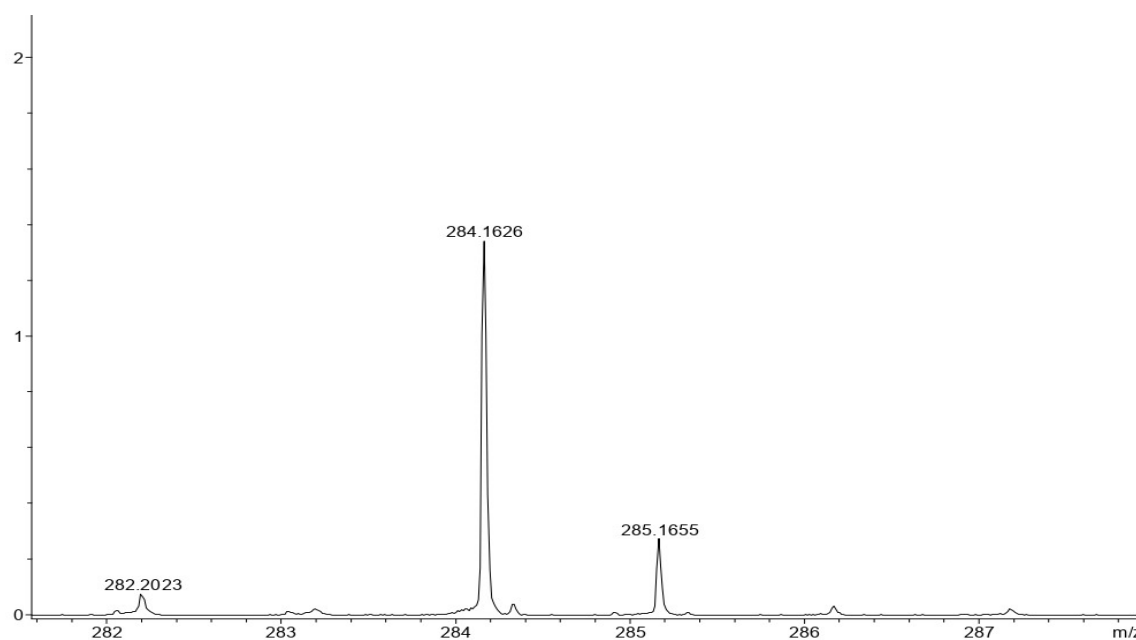

## Examination of the generation of acyl bromide

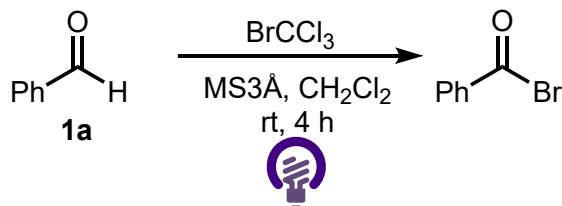

Benzaldehyde **1a** (20.4  $\mu\text{L}$ , 0.2 mmol), bromotrichloromethane (60.0  $\mu\text{L}$ , 0.6 mmol), MS3 $\text{\AA}$  (50 mg), and  $\text{CH}_2\text{Cl}_2$  (2.0 mL) were added into a 4 mL borosilicate vial. After bubbling with argon for 5 min, the resulting solution was stirred at room temperature under light irradiation ( $\lambda_{\text{ex}} = 380 \text{ nm}$ ) for 4 h. The reaction mixture was concentrated under reduced pressure to give the crude product. The  $^1\text{H}$  and  $^{13}\text{C}$  NMR peak of benzoyl bromide were confirmed by comparison with the previous literature.<sup>17</sup>

Benzoyl bromide;  $^1\text{H}$  NMR (600 MHz,  $\text{CDCl}_3$ )  $\delta$  8.08 (d,  $J = 8.4 \text{ Hz}$ , 2H), 7.71-7.67 (m, 1H), 7.56-7.49 (m, 2H).  $^{13}\text{C}$  NMR (150 MHz,  $\text{CDCl}_3$ )  $\delta$  165.8, 135.6, 135.0, 132.1, 129.0.

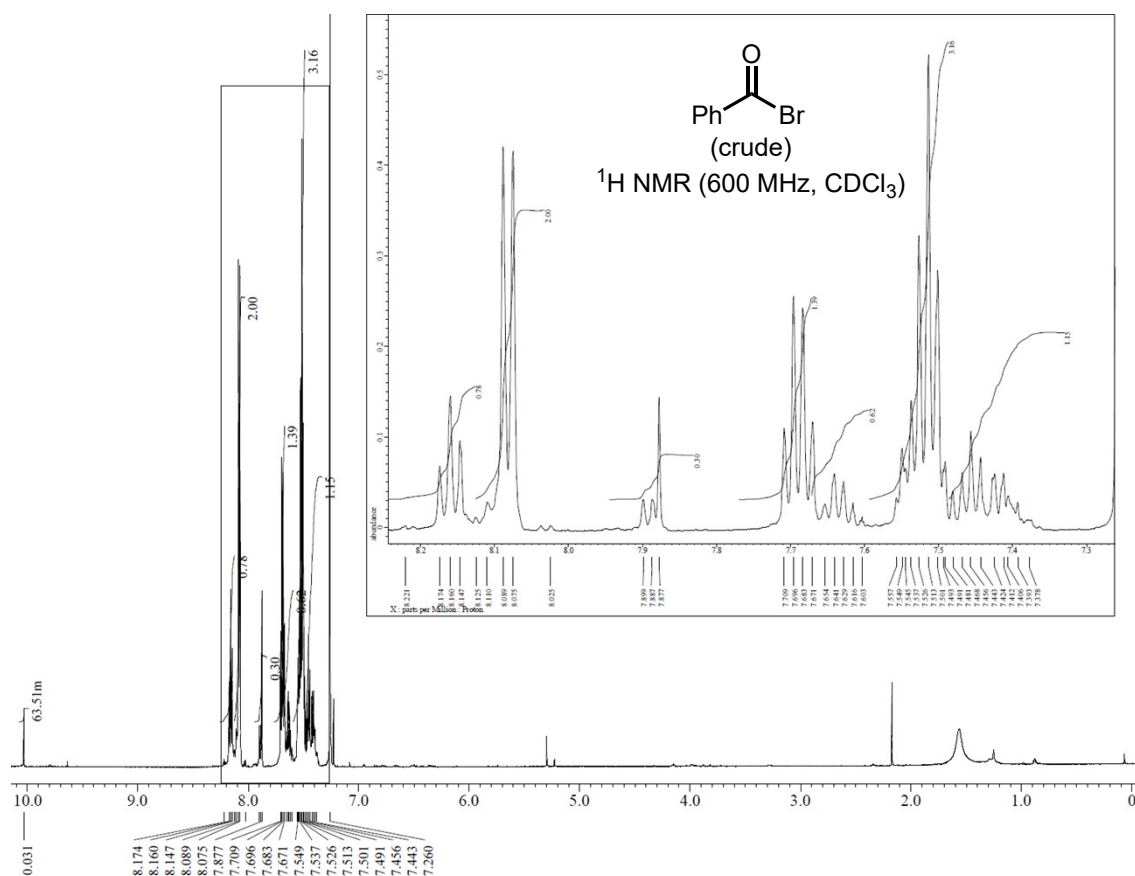

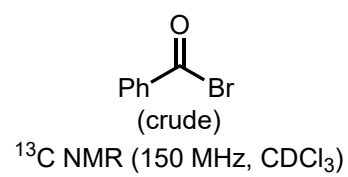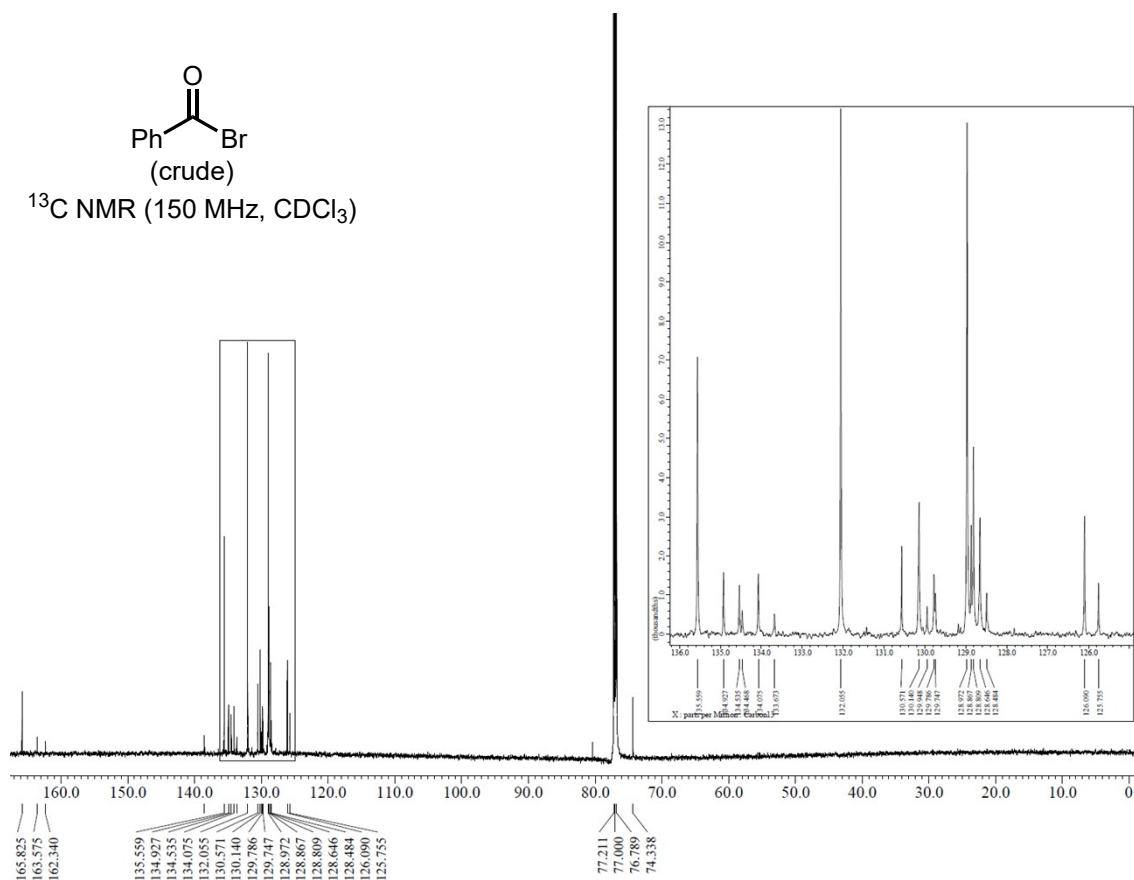

### 3. Reference

1. G. Pandey, S. Koley, R. Talukdar, P. K. Sahani, *Org. Lett.* 2018, **20**, 5861-5865.
2. Y. Nakatani, Y. Koizumi, R. Yamasaki, S. Saito, *Org. Lett.* 2008, **10**, 2067-2070.
3. W. Kong, B. Li, X. Xu, Q. Song, *J. Org. Chem.* 2016, **81**, 8436-8443.
4. B. E. Maki, A. Chen, E. M. Phillips, K. A. Scheidt, *Org. Lett.* 2007, **9**, 371-374.
5. X. Yang, Y. Guo, H. Tong, R. Liu, R. Zhou, *Green Chem.* 2023, **25**, 1672-1678.
6. J. Zou, K. S. Iyer, S. G. Stewart, C. L. Raston, *New J. Chem.* 2011, **35**, 854-860.
7. H. Back, M. Minakawa, Y. M. A. Yamada, J. W. Han, Y. Uozumi, *Sci. Rep.* 2016, **6**, 25925.
8. L. Ferrar, M. Mis, P. J. Dinnocenzo, S. Farid, B. P. Merkel, R. D. Robello, *J. Org. Chem.* 2008, **73**, 5683-5692.
9. R. Tiwari, A. Rahman, N. S. Bhat, S. B. Onkarappa, S. S. Mal, S. Dutta, *ChemistrySelect* 2019, **4**, 9119 – 9123.
10. F. H. Jiang, X. Y. Shen, Y. Z. Wang, *J. Tetrahedron lett.* 2007, **48**, 7542-7545.
11. H. Liu, Y. Dang, Y. Yuan, Z. Xu, S. Qiu, H. Tan, *Org. Lett.* 2016, **18**, 5584-5587.
12. Y. Yuan, X. Wu, F. Wu, *Synlett*, 2019, **30**, 1820-1824.
13. L. Ren, L. Wang, Y. Lv, G. Li, S. Gao, *Org. Lett.* 2015, **17**, 5172-5175.
14. S. Wu, Y. Wang, H. Tao, Z. Yu, L. Wu, X. Meng, Y. Zhang, *ChemistrySelect* 2023, **8**, e202204112
15. M. Hatano, Y. Furuya, T. Shimmura, K. Moriyama, S. Kamiya, T. Maki, K. Ishihara, *Org. Lett.* 2011, **13**, 426-429.
16. M. Hatano, S. Kamiya, K. Ishihara, *Chem. Commun.* 2012, **48**, 9465-9467.
17. Kanga, S.; La, M. T.; Kim, H.-K. *Tetrahedron Lett.* 2018, **59**, 3541-3546.

#### 4. $^1\text{H}$ and $^{13}\text{C}$ NMR spectra data

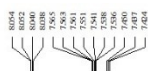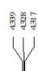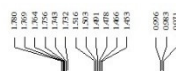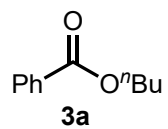

$^1\text{H}$  NMR (600 MHz,  $\text{CDCl}_3$ )

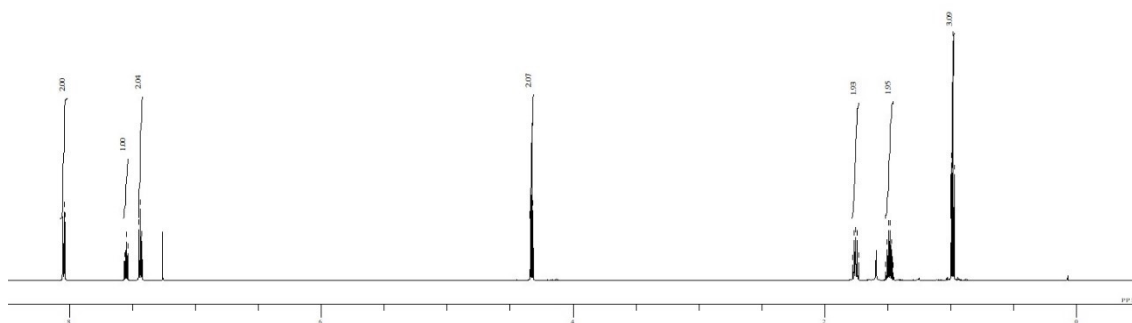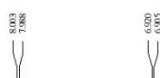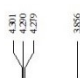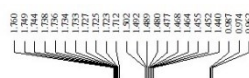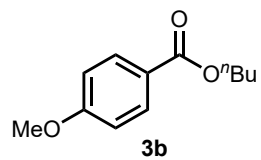

$^1\text{H}$  NMR (600 MHz,  $\text{CDCl}_3$ )

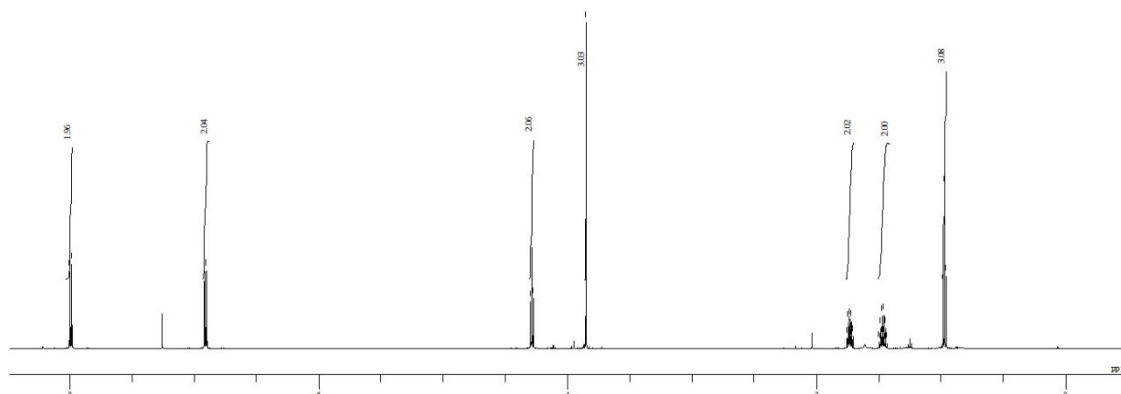



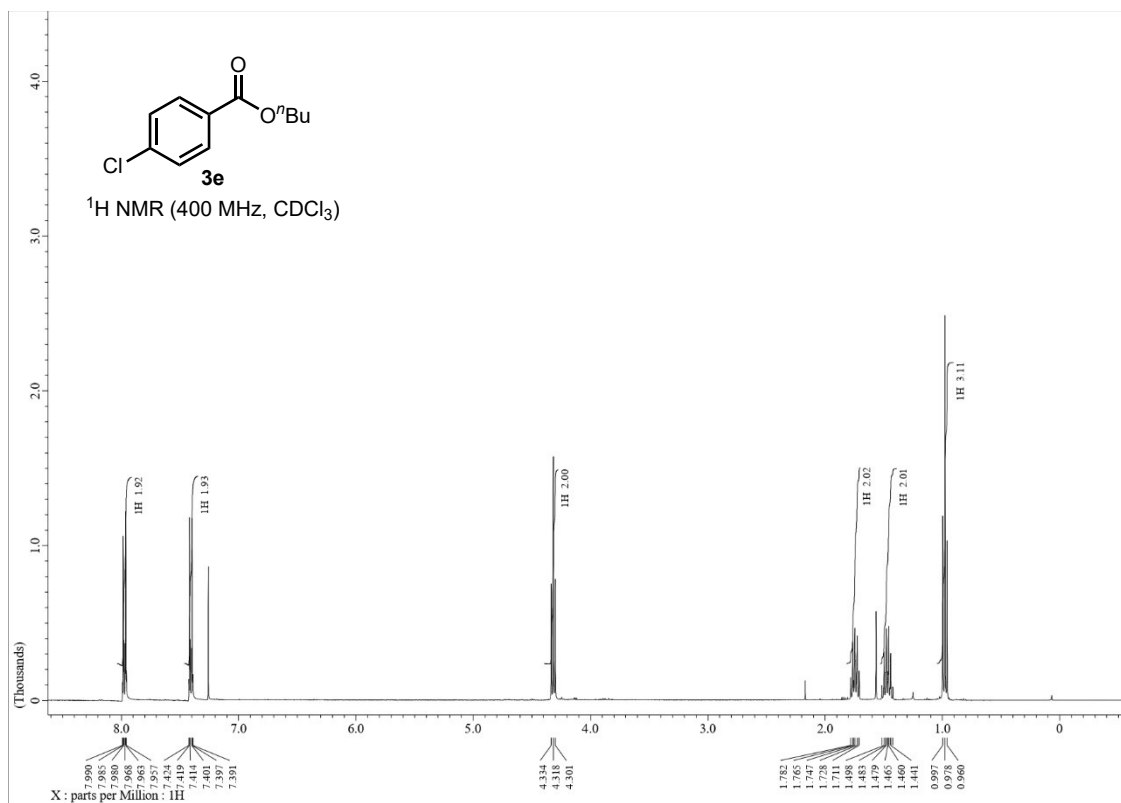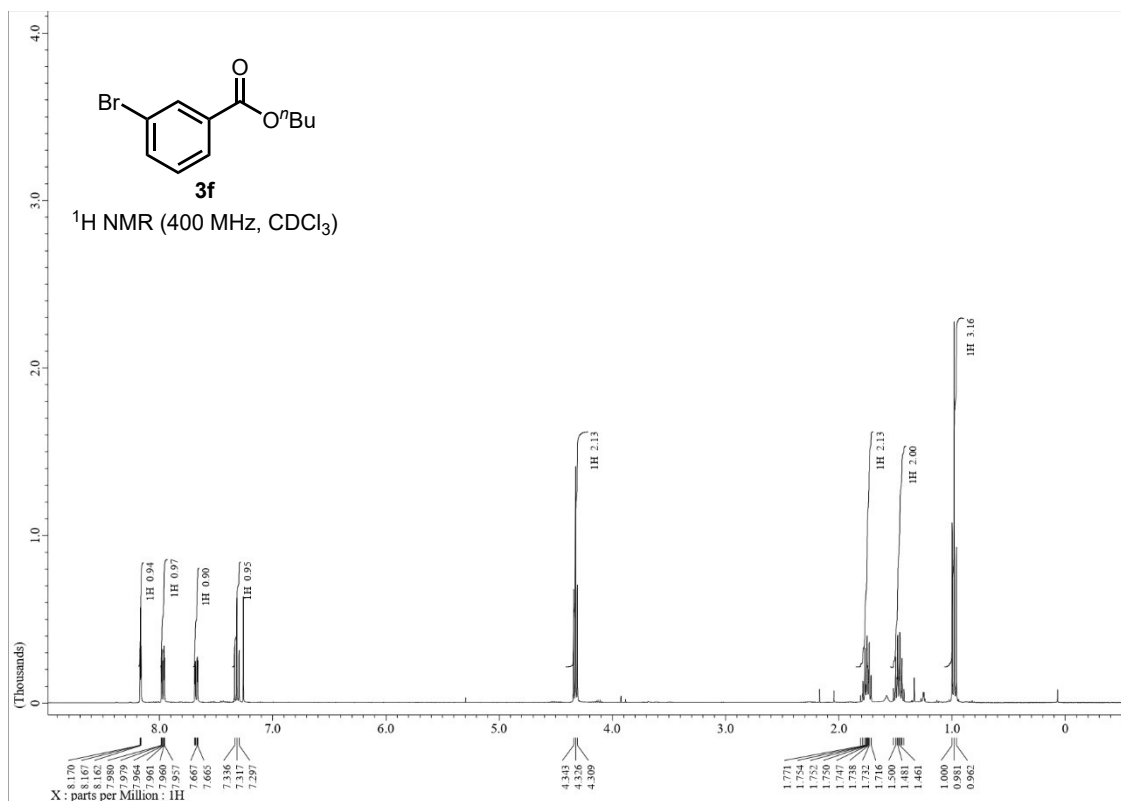

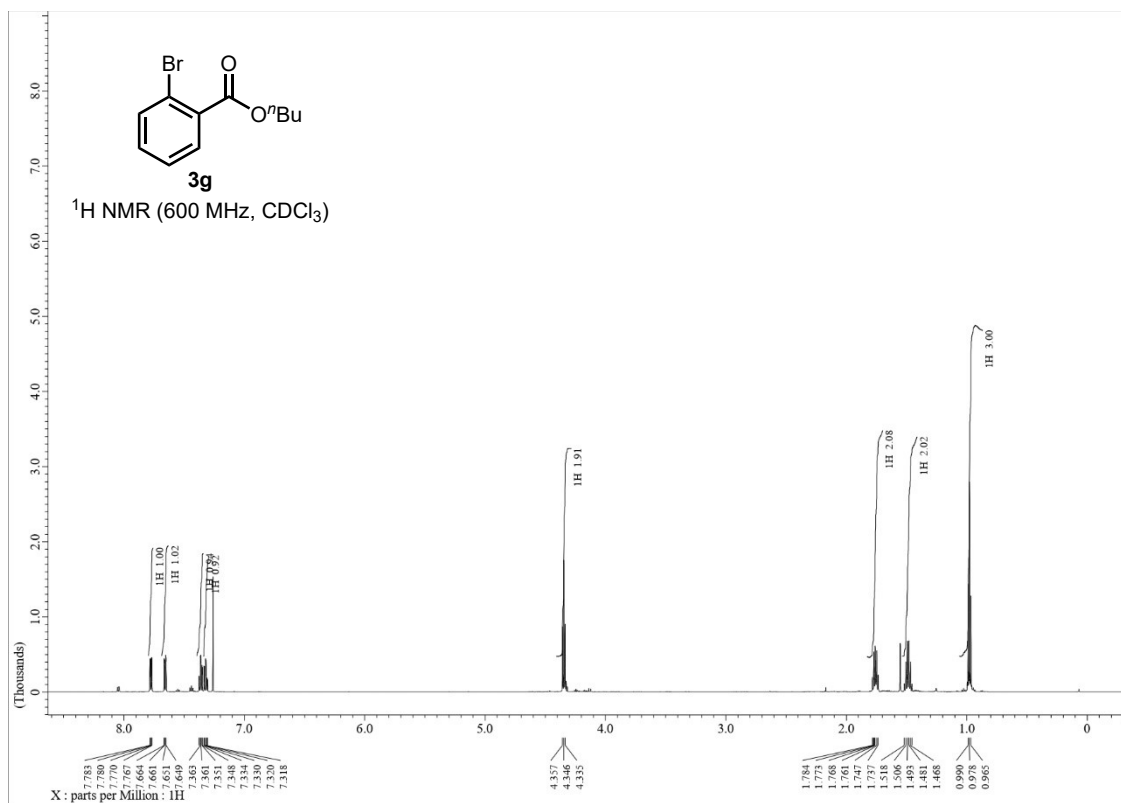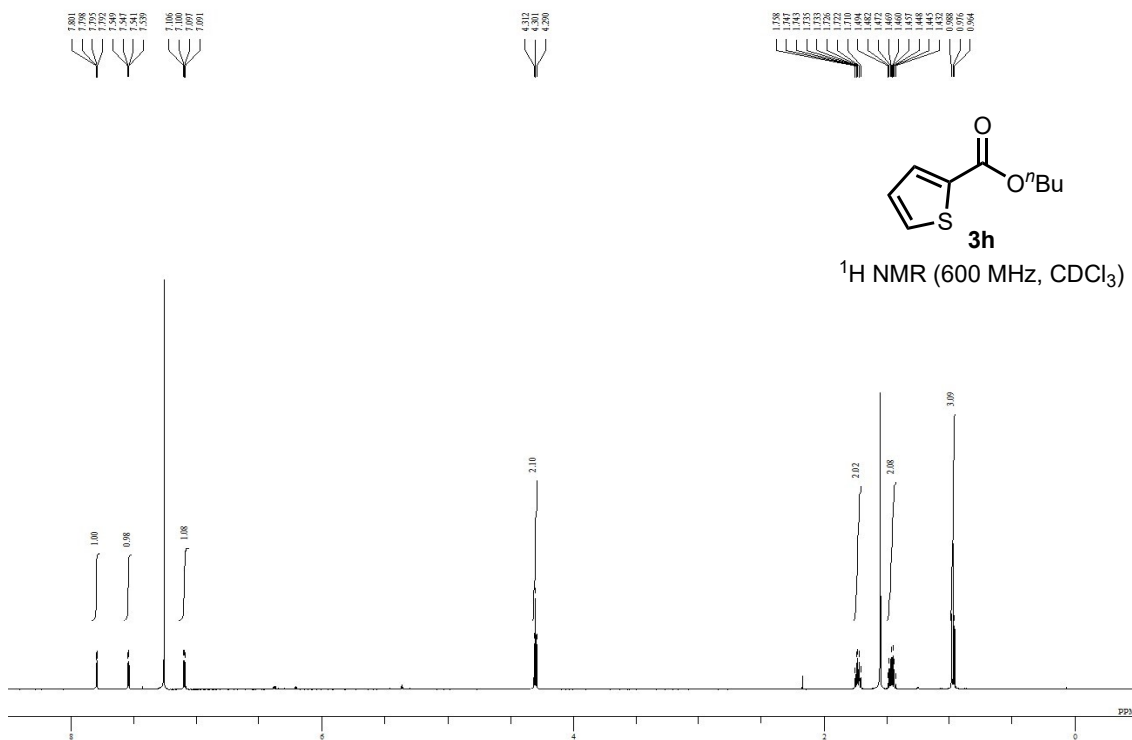

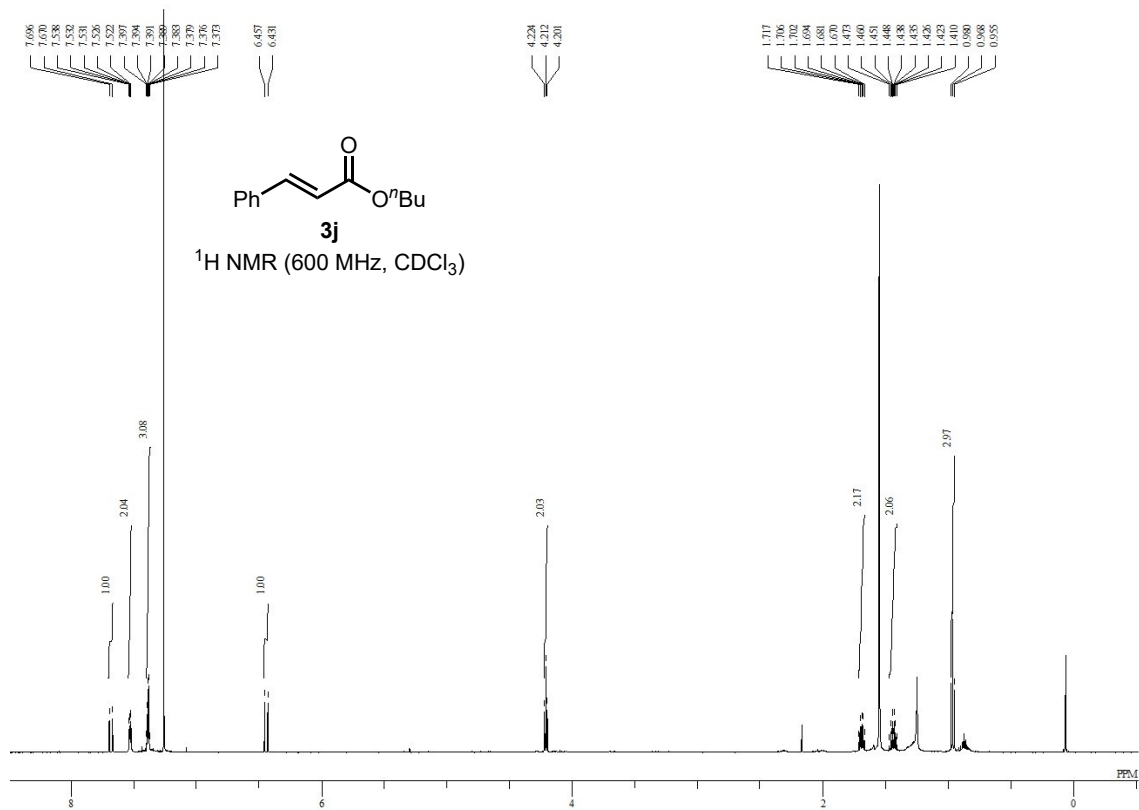

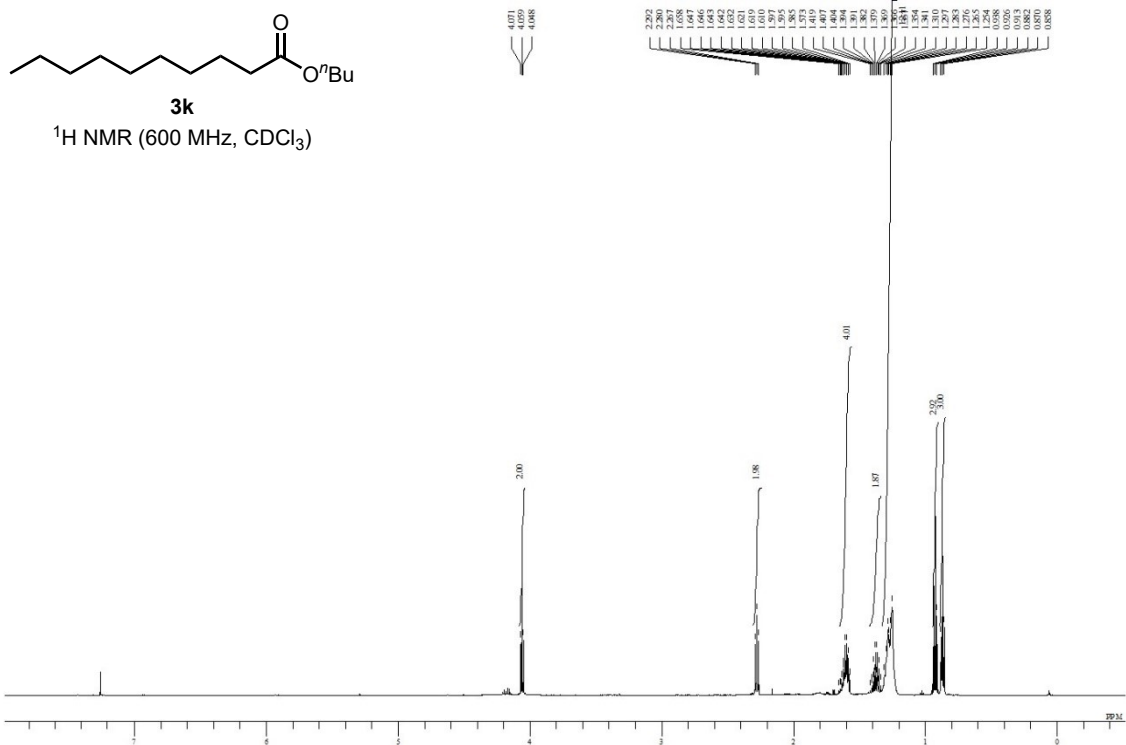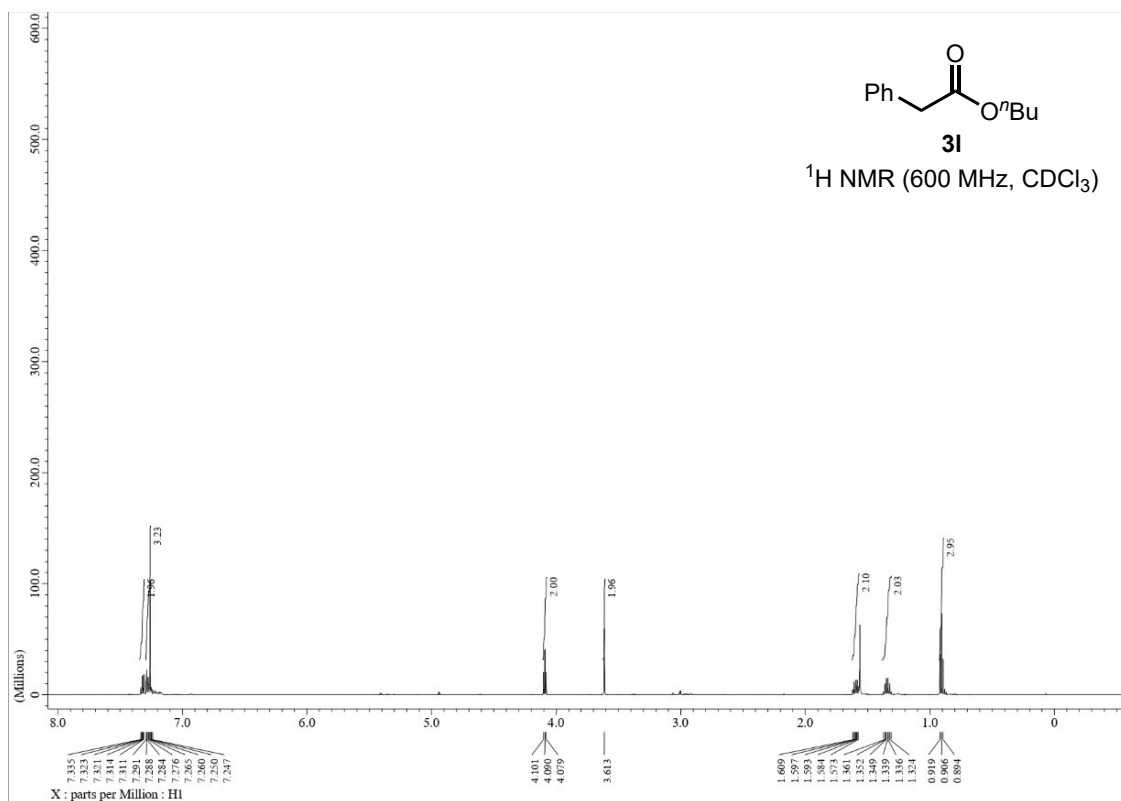

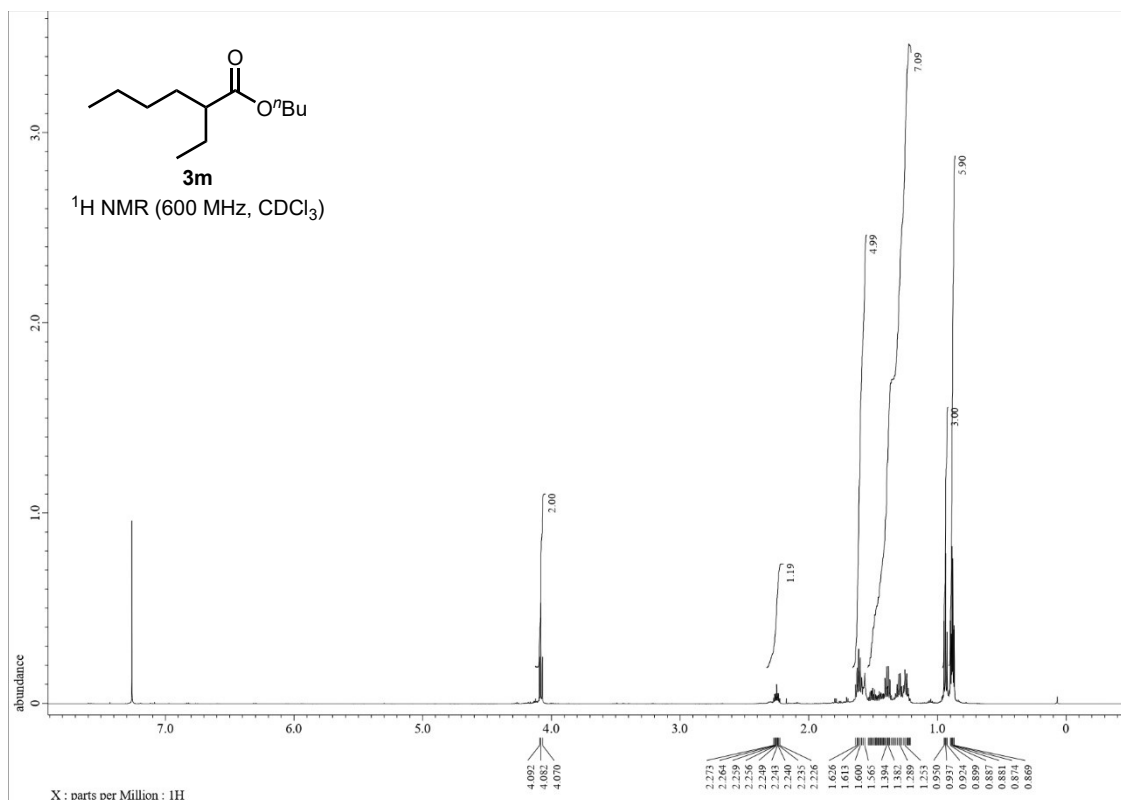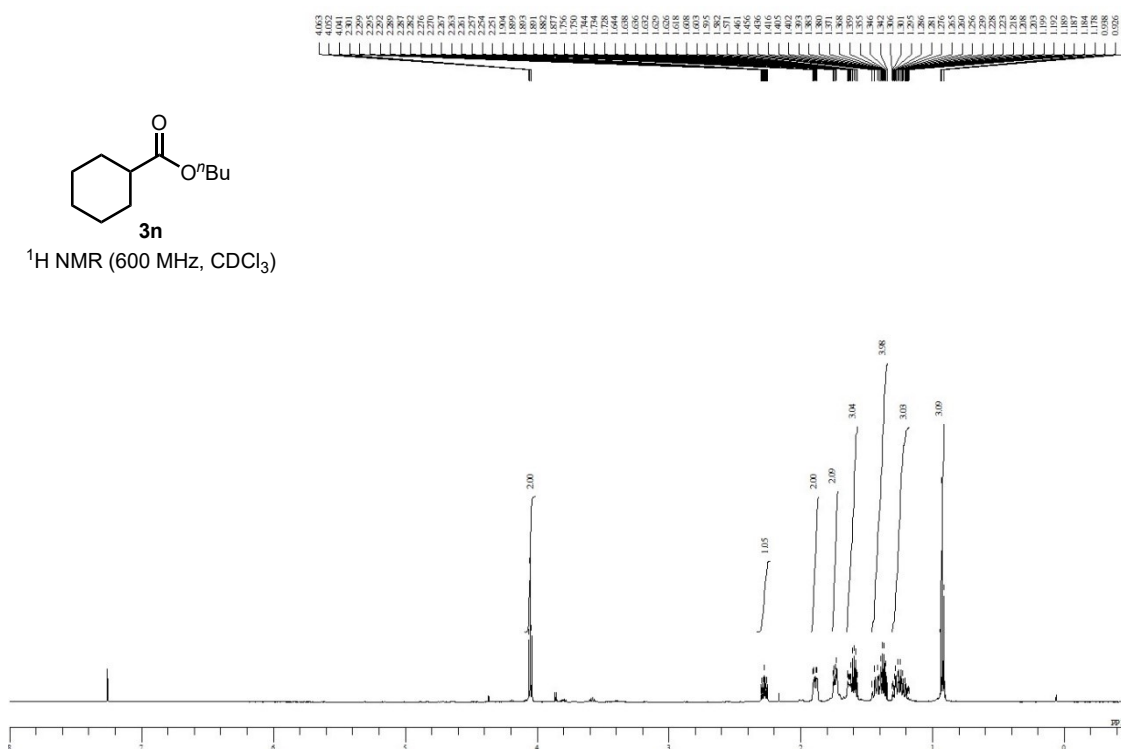

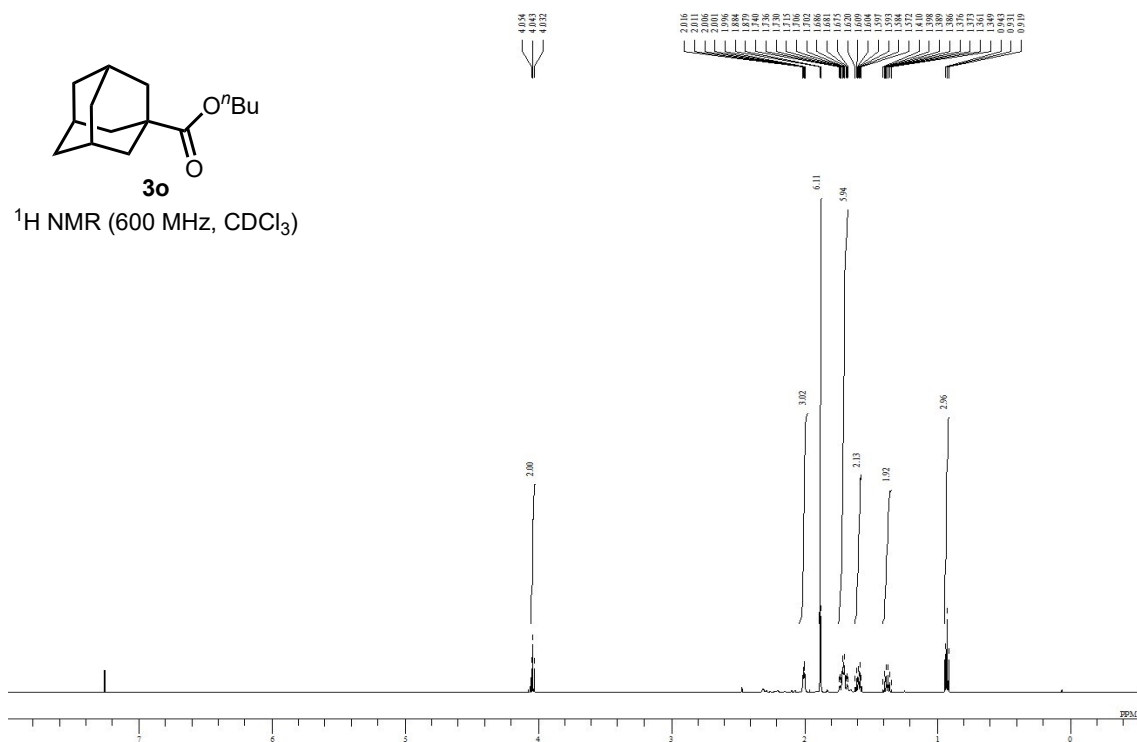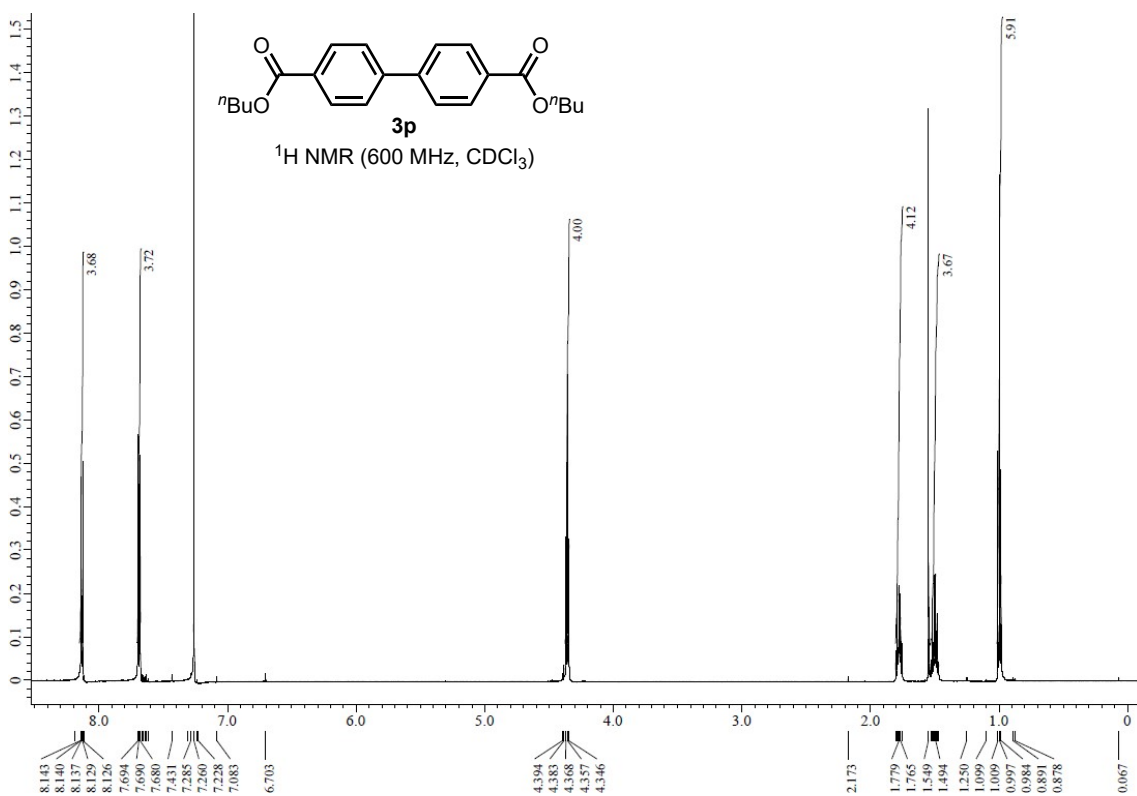

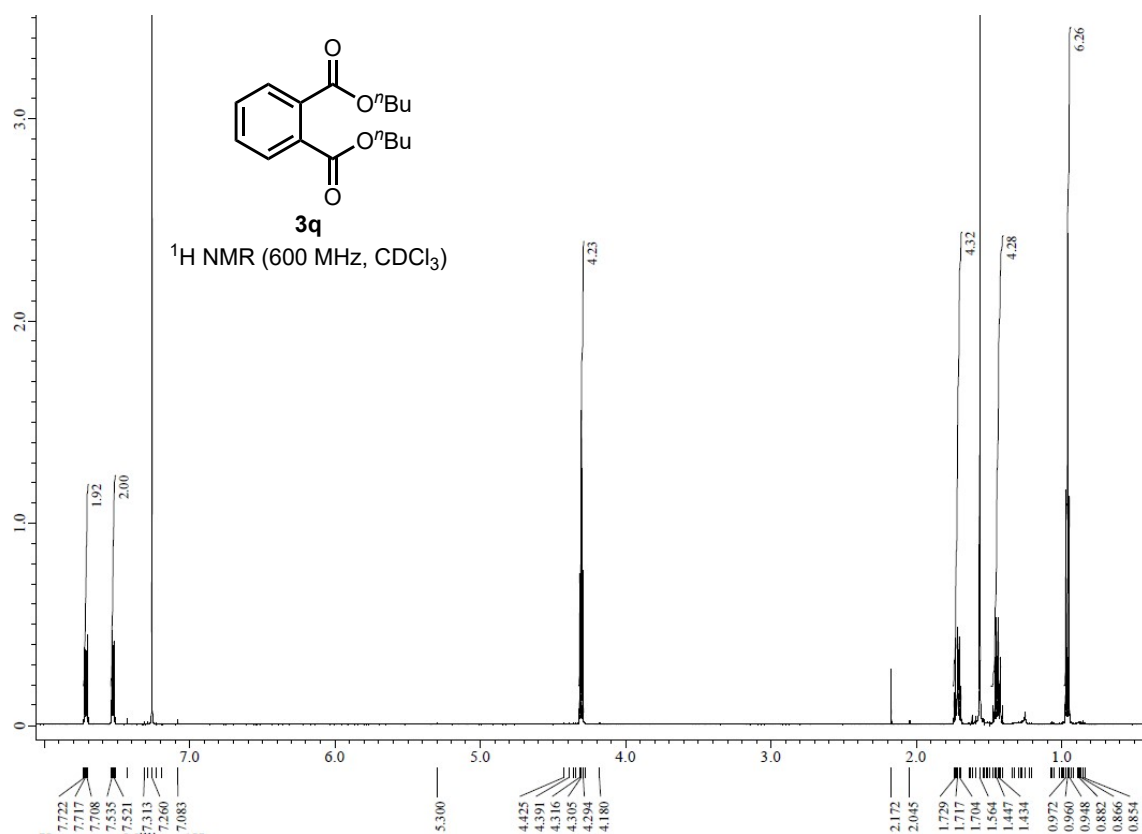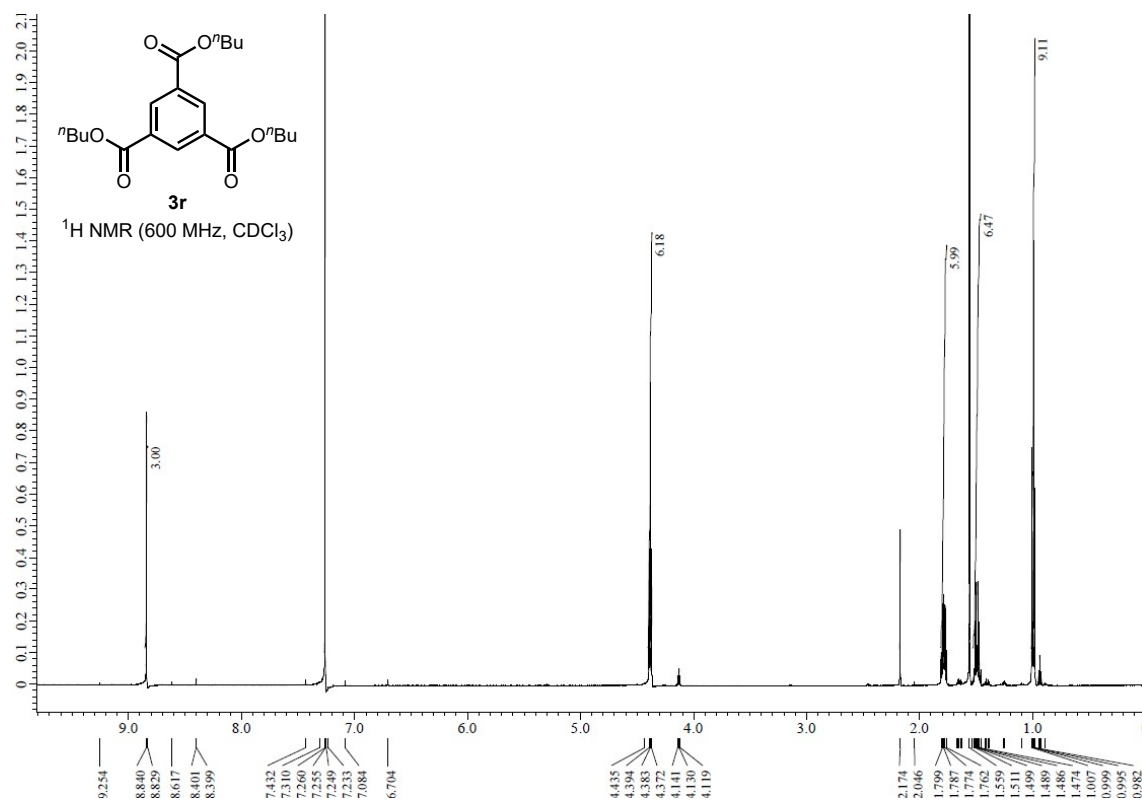

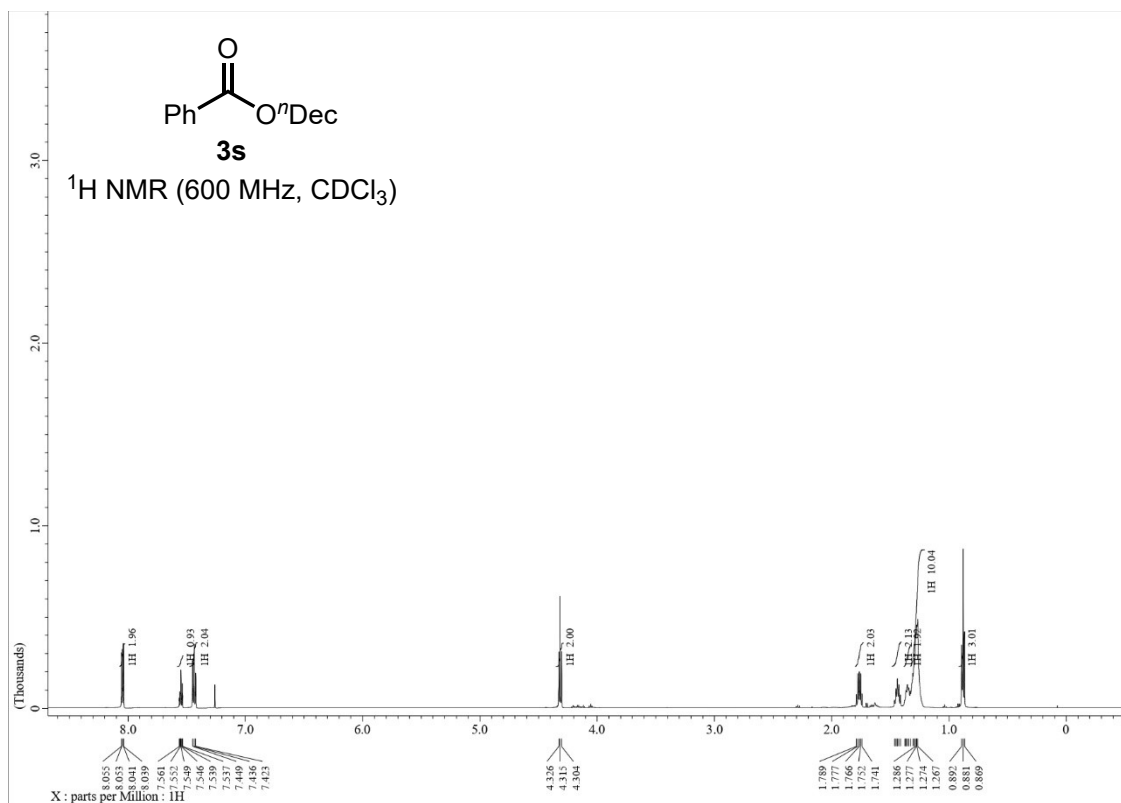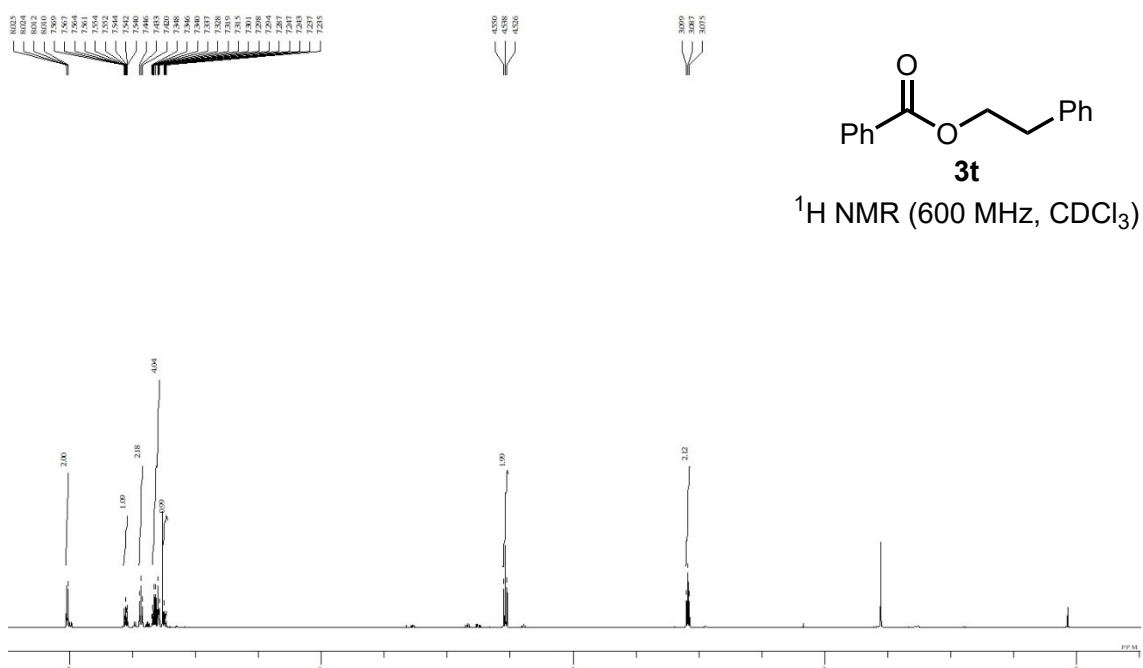

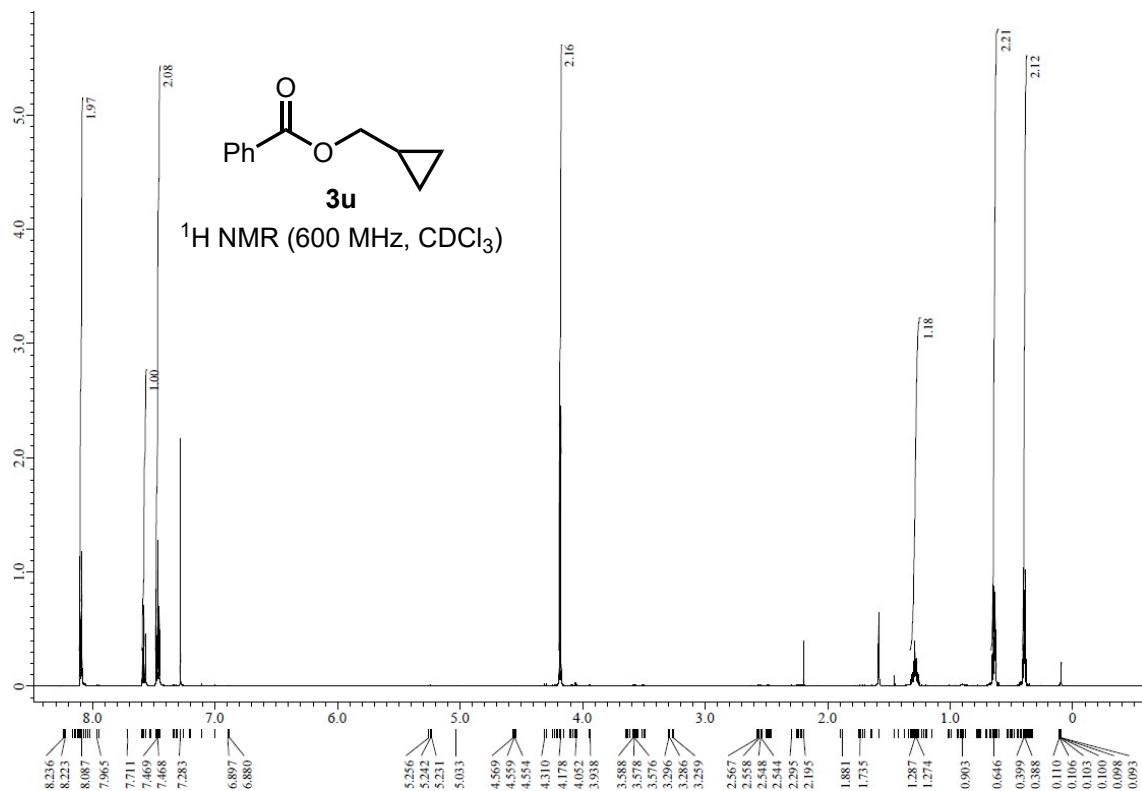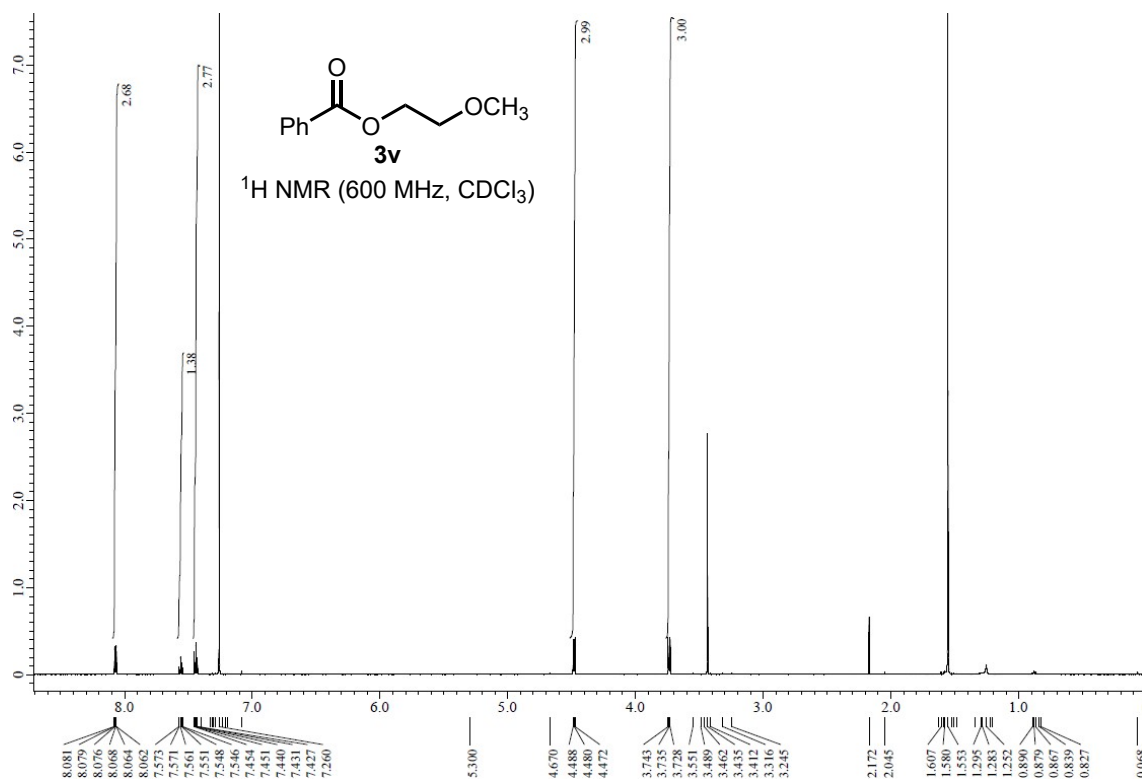

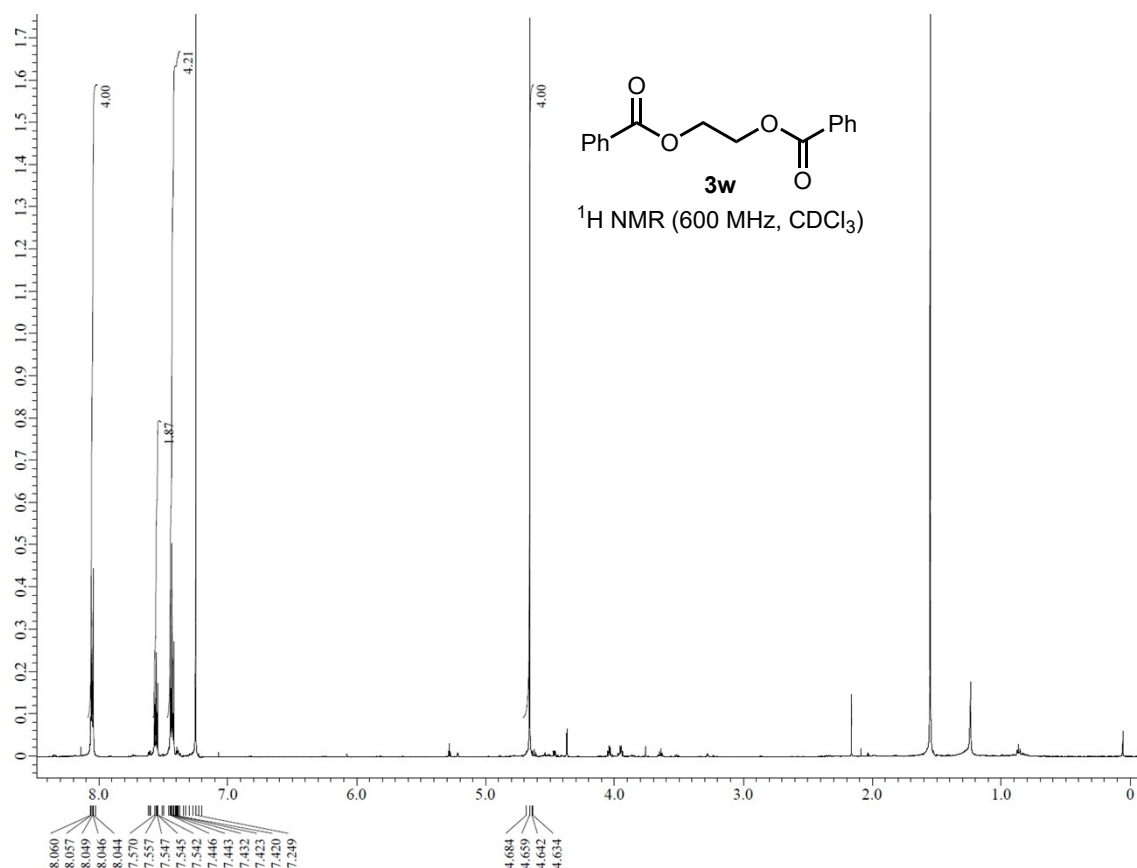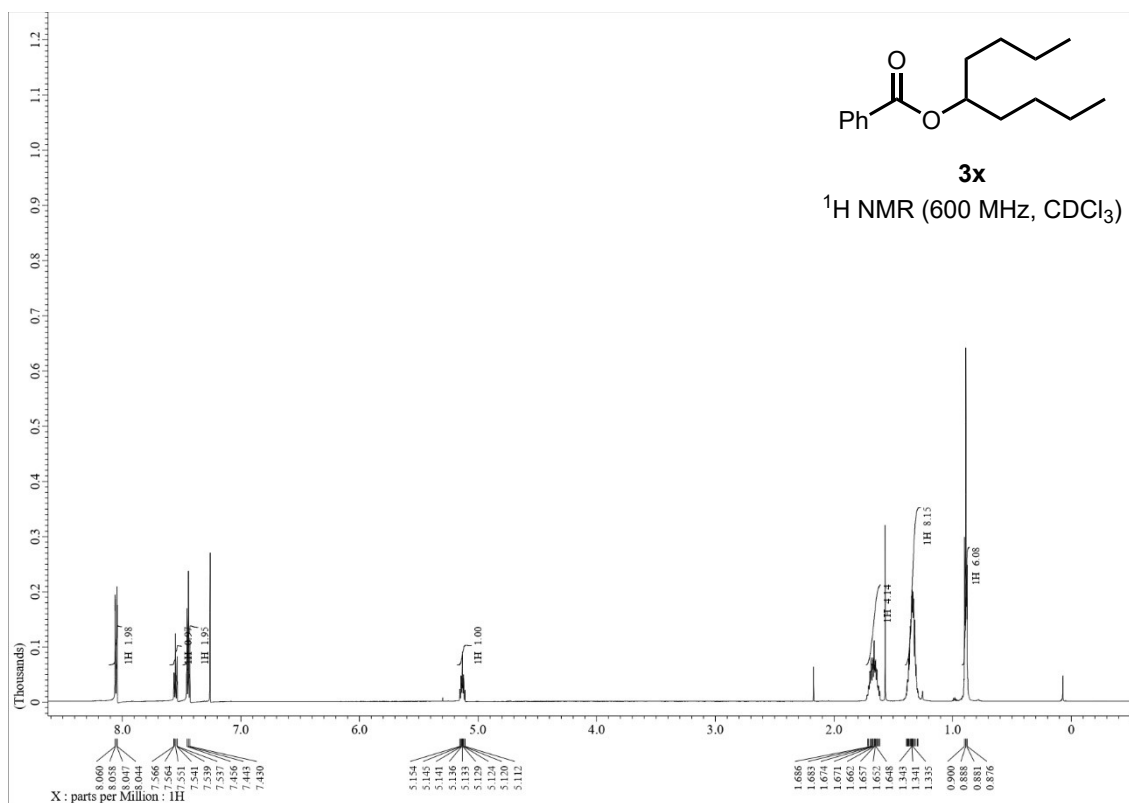

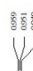<sup>1</sup>H NMR (600 MHz, CDCl<sub>3</sub>)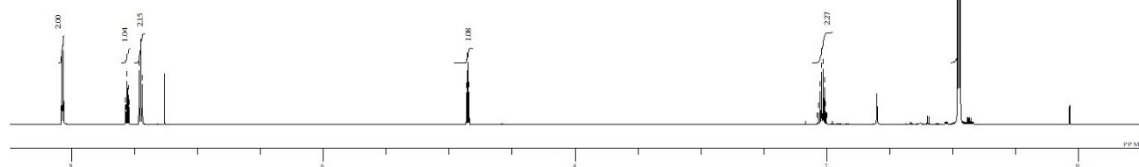

Supplement: d4ob01237b1.pdf [file d4ob01237b1.pdf]
